1 **Leaked genomic and mitochondrial DNA contribute to the host**  
2 **response to noroviruses in a STING-dependent manner**

3

4 Aminu S. Jahun<sup>1,#</sup>, Frederic Sorgeloos<sup>1,2</sup>, Yasmin Chaudhry<sup>1</sup>, Sabastine E. Arthur<sup>1,3</sup>, Myra  
5 Hosmillo<sup>1</sup>, Iliana Georgana<sup>1</sup>, Rhys Izuagbe<sup>1</sup>, Ian G. Goodfellow<sup>1,#</sup>

6

7 <sup>1</sup>Division of Virology, Department of Pathology, University of Cambridge, Addenbrooke's  
8 Hospital Level 5, Hills Road, Cambridge, CB2 0QQ, UK

9 <sup>2</sup>Université catholique de Louvain, de Duve Institute, MIPA-VIRO 74-49, 74 Avenue  
10 Hippocrate, B-1200 Brussels, Belgium

11 <sup>3</sup>Current address: Department of Microbiology and Immunology, UNC School of Medicine,  
12 University of North Carolina at Chapel Hill, USA

13 #Corresponding authors – [ig299@cam.ac.uk](mailto:ig299@cam.ac.uk), [asj40@cam.ac.uk](mailto:asj40@cam.ac.uk)

14

15 **Keywords:**

16 norovirus, STING, cGAS, IFI16, p204, interferon response, VF1, NS4, cytosolic DNA, DNA  
17 leakage, mitochondrial DNA, genomic DNA

18

19

20 **Abstract**

21 The cGAS-STING pathway is central to the IFN response against DNA viruses. However,  
22 recent studies are increasingly demonstrating its role in the restriction of some RNA viruses.  
23 Here we show that the cGAS-STING pathway also contributes to the IFN response against  
24 noroviruses, positive-sense single-stranded RNA viruses that are now one of the most  
25 common causes of infectious gastroenteritis world-wide. We show a significant reduction in  
26 IFN- $\beta$  induction and a corresponding increase in viral replication in norovirus-infected cells  
27 following STING inhibition, knockdown or deletion. Upstream of STING, we show that cells  
28 lacking either cGAS or IFI16 also have severely impaired IFN responses. Further, we  
29 demonstrate that immunostimulatory host genome-derived DNA, and to a lesser extent  
30 mitochondrial DNA, accumulate in the cytosol of norovirus-infected cells. And lastly,  
31 overexpression of the viral NS4 protein was sufficient to drive the accumulation of cytosolic  
32 DNA. Together, our data elucidate a role for cGAS, IFI16 and STING in the restriction of  
33 noroviruses, and demonstrate for the first time the utility of host genomic DNA as a damage-  
34 associated molecular pattern in cells infected with an RNA virus.

35

36 **Highlights:**

- 37
- 38 • cGAS, IFI16 and STING are required for a robust IFN response against noroviruses
  - 39 • Nuclear and mitochondrial DNA accumulate in the cytosols of infected cells
  - 40 • Viral NS4 mediates accumulation of cytosolic DNA

41

42

## 42 Introduction

43 Viruses and other pathogens are detected by a myriad of receptors called pattern recognition  
44 receptors (PRRs) [1]. These receptors are present in various compartments in the host cell,  
45 including on cell surfaces (such as toll-like receptors [TLRs] and c-type lectin receptors), in  
46 endosomes (TLRs), and in the cytosol (such as the retinoic acid-inducible gene 1 [RIG-I]-like  
47 receptors, or NOD-like receptors). They are germline encoded and are able to detect  
48 pathogen-associated molecular patterns (PAMPs) which are conserved molecular patterns  
49 unique to pathogens (such as uncapped 5' tri-phosphorylated RNA or double-stranded RNA),  
50 or common molecular signatures in aberrant conditions (such as the presence DNA in the  
51 cytosol). Activation of these sensors initiates signaling cascades that trigger the release of  
52 interferons (IFNs) and other cytokines, and promote the restriction of the invading pathogen.

53

54 Noroviruses are positive-sense single-stranded RNA viruses, with ~7.4kb genomes  
55 comprising 3-4 open-reading frames and a poly(A) tail [2]. The human noroviruses (HuNoVs),  
56 against which there are no approved vaccines or treatment, are the commonest causes of  
57 infectious gastroenteritis worldwide, with up to 677 million cases and more than 200,000  
58 deaths every year in children under 5 [3–5]. The murine norovirus (MNV) is broadly used as a  
59 surrogate model for studying the biology of noroviruses due to the availability of a reverse  
60 genetics system and a robust animal model, as well as an efficient virus culture system in  
61 widely available cell lines and primary cells [2]. Using MNV as a model, MDA5 and NLRP6  
62 have been previously demonstrated to play important roles in initiating IFN responses  
63 following infection with noroviruses, both *in vivo* and in primary cells [6–8]. The distribution of  
64 these receptors is complementary and varies with cell type, such that MDA5 is largely  
65 expressed in myeloid cells, while NLRP6 is predominantly expressed in epithelial cells [8].  
66 However, the effect of NLRP6 depletion on virus replication is only marginal [8]. Additionally,  
67 depletion of STAT1, a central mediator of signalling downstream of IFN receptors, leads to  
68 profoundly higher viral titres than those following MDA5 depletion, both *in vivo* [6,9] and *in*  
69 *vitro* [6,10], suggesting the presence of other receptors or pathways that contribute to innate  
70 immune responses against noroviruses.

71

72 While the cGAS-STING pathway is mostly associated with restriction of DNA viruses [1], there  
73 have been reports of its role in the restriction of replication of RNA viruses, in both IFN  
74 dependent and independent manners [11–15]. This is thought to be mediated by the presence  
75 of leaked mitochondrial DNA (mtDNA) in the cytosol resulting from viroporin-mediated calcium  
76 imbalances [12], infection-induced mitochondrial damage [11,15], or via an as yet undefined

77 mechanism downstream of IL-1 $\beta$  receptor signalling [16]. This leaked mtDNA acts as a  
78 Damage-Associated Molecular Pattern (DAMP), activating host responses downstream of  
79 STING. Thus far, there are no reports of genomic DNA acting as DAMPs in the same manner,  
80 although previous studies have demonstrated STING activation following genomic DNA  
81 leakage into the cytosol in tumour cells [17,18], following extensive DNA damage from  
82 irradiation [19], or from exposure to some anticancer agents [20]. Indeed STING-dependent  
83 IFN responses to leaked genomic DNA are thought to significantly contribute to the  
84 chemotherapeutic activities of certain anticancer drugs [21,22].

85

86 In the current study, we observed a considerable attenuation of IFN responses and a  
87 commensurate increase in viral replication in norovirus-infected primary cells and cell lines  
88 following treatment with small molecule inhibitors of STING. We also show a reduction in  
89 induction of IFNs and IFN-stimulated genes (ISGs) in norovirus-infected STING<sup>-/-</sup> cells, as well  
90 as cGAS<sup>-/-</sup> and IFI16<sup>-/-</sup> cells. We further demonstrate a substantial accumulation of nuclear  
91 DNA, and to a lesser extent mtDNA, in the cytosol of infected cells, likely mediated by the viral  
92 NS4 protein. In summary, we show for the first time a host-pathogen dynamic whereby  
93 genomic DNA acts as a damage-associated molecular pattern in cells infected with an RNA  
94 virus.

95

## 96 **Results**

### 97 ***MNV induces IFNs only in STING-competent cells***

98 The MNV VF1 protein counteracts induction of type I IFNs through an as yet unknown  
99 mechanism [23,24]. A common and significant challenge in studying the functions of MNV  
100 proteins, including VF1, is that primary murine macrophages and MNV-permissive cell lines  
101 are often difficult to transfect [25,26], and the transfection process itself frequently leads to  
102 induction of IFNs. To circumvent these limitations, we transduced two easy-to-transfect cell  
103 lines, HeLa and HEK293T, with the MNV receptor CD300lf to make them permissive to MNV  
104 infection [27,28]. To examine whether VF1 inhibits IFN induction in human cells, the CD300lf-  
105 expressing HeLa and HEK293T cells were infected with wild-type MNV1 or the previously  
106 described VF1-negative mutant M1 in which a stop codon was introduced at position 17 of  
107 VF1 without affecting the underlying VP1 sequence [23]. As seen previously in RAW264.7  
108 cells [23], HeLa-CD300lf cells infected with MNV1 induced substantial increase of IFN- $\beta$ , with  
109 the M1 virus inducing higher levels of IFN- $\beta$  compared to cells that were infected with wild type  
110 MNV1 (Figure 1a). By contrast, there was little or no IFN- $\beta$  induction in HEK293T-CD300lf

111 cells infected with either the wild type virus or M1, with no difference seen in IFN induction  
112 between cells infected with the wild type MNV1 compared to those infected with the M1 mutant  
113 (Figure 1a). These findings suggest that a factor or pathway present in HeLa and RAW264.7  
114 cells, but absent in HEK293T is required for both a robust induction of IFN in MNV-infected  
115 cells, as well as the phenotypic differences observed between cells infected with the wild type  
116 and M1 viruses.

117

118 To further examine IFN induction in HeLa-CD300lf and HEK293T-CD300lf cells following  
119 infection with MNV, the cells were either mock-infected, or infected with wild type MNV1 at a  
120 high MOI, harvested 10 hours post infection and the lysates assessed using western blotting.  
121 As shown in Figure 1b (right panel), there was no difference in the levels of phospho-IRF3 and  
122 phospho-STAT1 between the mock-infected cells and cells infected with MNV1 in HEK293T-  
123 CD300lf cells. This contrasts with infection in HeLa-CD300lf cells (Figure 1b, left panel) where  
124 a significant increase is seen in the levels of both phospho-IRF3 and phospho-STAT1  
125 following infection with MNV1. We also observed profoundly higher levels in viral titres from  
126 the HEK293T-CD300lf cells compared to HeLa-CD300lf cells (Figure 1c). The HEK293T-  
127 CD300lf cells have an intact RNA sensing pathway as they are able to phosphorylate STAT1  
128 in response to poly (I:C) transfection (Figure 1d). Both being epithelial-like cell lines, HeLa and  
129 HEK293T cells likely express the same repertoire of components of the IFN response  
130 pathway, with an exception of the adapter protein STING that is only marginally expressed in  
131 HEK293T cells, compared to HeLa cells (Burdette *et al.*[29], and Figure 1e). Taken together,  
132 these data demonstrate an attenuation of the IFN response to MNV1 infection in HEK293T-  
133 CD300lf cells, compared to HeLa-CD300lf and RAW264.7 cells, and putatively suggesting a  
134 role for STING, or other factors non-functional in HEK293T-CD300lf cells, in the IFN response  
135 against noroviruses.

136

### 137 ***Small-molecule inhibition of STING activation enhances replication of noroviruses in*** 138 ***cell lines and primary cells***

139 To explore the role of STING in the antiviral response against MNV, we made use of the  
140 recently described covalent small-molecule inhibitors of STING; C-176 and H-151 [30]. As  
141 shown in Figure 2a, both molecules were able to inhibit induction of IFN- $\beta$  following  
142 transfection of poly (dA:dT) in RAW264.7 cells, but not poly (I:C), consistent with previously  
143 published results. To determine whether STING is required for induction of IFNs following  
144 infection with MNV, RAW264.7 cells were pre-treated with DMSO or titrated doses of C-176  
145 or H-151, and then infected with wild type MNV1 at a high MOI. The cells were harvested 9

146 hours post infection and subjected to RT-qPCR. As shown in Figure 2b, there was a significant  
147 dose-dependent decrease in IFN- $\beta$  induction in cells treated with either C-176 or H-151,  
148 compared to DMSO control. These data suggest that STING is required for a robust induction  
149 of IFNs in RAW264.7 cells infected with MNV1.

150

151 To examine the role of STING in primary macrophages, bone marrow cells from C57BL/6 mice  
152 were differentiated into bone marrow-derived macrophages (BMDMs), pre-treated with either  
153 DMSO or titrated doses of C-176 or H-151, and subsequently infected with MNV1 at a high  
154 MOI. The cells were harvested 12 hours post infection and subjected to RT-qPCR. As shown  
155 in Figure 2c, and consistent with data from assays in RAW264.7 cells, there was a significant  
156 dose-dependent decrease in IFN- $\beta$  induction in MNV-infected BMDMs following treatment with  
157 the small-molecule inhibitors of STING. To determine the role of STING in restricting MNV1  
158 replication, BMDMs were pre-treated with DMSO or titrated doses of C-176 or H-151, and then  
159 infected with MNV1. The samples were harvested at different time points post infection and  
160 infectious viral titres were determined using TCID50. As shown in figure 2d, there is a  
161 significant dose-dependent increase in viral titres following treatment with STING inhibitors.  
162 Altogether, these data indicate that STING plays an important role in the antiviral responses  
163 to MNV1 in both primary macrophages and cell lines.

164

165 Next, we wanted to see if there is a similar role for STING in the IFN responses against human  
166 noroviruses. For this, we made use of the recently described HGT-NV cells [31], a human  
167 gastric tumour cell line stably harbouring a GI.I human norovirus replicon. The cells were  
168 treated with DMSO or indicated doses of H-151, harvested 24 hours post treatment and  
169 subjected to RT-qPCR. As shown in Figure 2e, inhibition of STING activation led to a  
170 significant increase in the HuNoV genomes, in a dose-dependent manner. We also saw a  
171 marked increase in viral proteins at 72 hours after treatment in these cells (Figure 2f). Taken  
172 together, these results suggest that STING contributes to the restriction of both human and  
173 murine noroviruses during replication.

174

### 175 ***STING<sup>-/-</sup> cells induce an attenuated antiviral response against noroviruses***

176 To confirm the role of STING in the IFN responses against noroviruses, we used the  
177 CRISPR/Cas9 system to generate two clones of STING<sup>-/-</sup> RAW267.4 cell lines (Figure 3a).  
178 Both clone 14 (C14) and clone 22 (C22) STING<sup>-/-</sup> cells induced IFN- $\beta$  at similar levels to the  
179 wild-type cells following transfection of poly (I:C), but showed a significantly impaired response

180 to transfected poly (dA:dT), as expected (Figure 3b). To determine the effect of STING  
181 depletion on IFN- $\beta$  response to MNV, STING<sup>+/+</sup> and C14 and C22 STING<sup>-/-</sup> cells were either  
182 mock-infected or infected with wild-type MNV1 at an MOI of 5 and harvested at 9 hours post  
183 infection. Samples were then assessed for IFN- $\beta$  mRNA by RT-qPCR. Both clones of STING<sup>-/-</sup>  
184 <sup>-/-</sup> cells showed a significant decrease in IFN- $\beta$  induction and ISGs following infection with  
185 MNV1 (Figure 3c) at both high and low MOI, in agreement with data from the small-molecule  
186 inhibition experiments, and overall confirm a role for STING in the antiviral responses to MNV1  
187 infection. These data are also consistent with data obtained from RAW264.7 cell transduced  
188 with shRNA targeting STING (Figure S1).

189

### 190 ***Both cGAS and IFI-16 contribute to IFN responses in norovirus-infected cells***

191 Next, the upstream receptor that mediates STING activation in MNV-infected cells was  
192 examined. Activation of either cGAS or IFI16 leads to activation of STING and eventually  
193 induction of IFNs [1]. To explore the roles of these receptors in norovirus-infected cells, we  
194 used RAW264.7 cells stably expressing a secreted luciferase under the control of the ISG54  
195 (ISRE) promoter (RAW-Lucia ISG cells). Wild-type, cGAS<sup>-/-</sup> or IFI16<sup>-/-</sup> (p204<sup>-/-</sup>) cells were  
196 infected with MNV1 at an MOI of 5. As controls, MAVS<sup>-/-</sup>, STING<sup>-/-</sup>, and MDA5<sup>-/-</sup> were also  
197 infected at the same MOI. The supernatants were harvested at 18 hours post infection and  
198 analysed on a luminometer. As shown in Figures 4a and 4b, there was a significant decrease  
199 IFN- $\beta$  induction in both cGAS<sup>-/-</sup> and IFI16<sup>-/-</sup>, compared to wild-type cells, and comparable to  
200 the decrease seen in MAVS<sup>-/-</sup>, STING<sup>-/-</sup>, and MDA5<sup>-/-</sup> cells. These data suggest that both cGAS  
201 and IFI16 are required for a robust induction in IFN- $\beta$  in MNV-infected cells.

202

### 203 ***Aberrant cytosolic DNA from norovirus-infected cells induces an IFN response, in a*** 204 ***STING-dependent manner***

205 Mitochondrial DNA has also been demonstrated to accumulate in the cytosol of host cells  
206 following infection by some RNA viruses, including Dengue virus [11], Chikungunya virus [13],  
207 Influenza A virus [12], and encephalomyocarditis virus (EMCV) [12]. This aberrant presence  
208 of DNA in the cytosol then leads to activation of the cGAS-STING pathway and the ensuing  
209 IFN response. To determine if mtDNA accumulates in the cytosol of norovirus-infected cells,  
210 RAW267.4 cells were either mock-infected or infected at an MOI of 0.5 or 5, and harvested  
211 12 hours post-infection. The cells were then lysed in a digitonin buffer and fractionated. DNA  
212 was extracted from the cytosolic fractions and the presence of mtDNA was determined by  
213 qPCR using two previously described primer sets. As shown in Figure 5a, there was a

214 moderate accumulation of mtDNA in the cytosol of infected cells, with higher levels observed  
215 with increased MOI. Alongside this, we also observed a sizeable dose-dependent increase in  
216 genome-derived GAPDH and HPRT DNA in the cytosol of infected cells. Taken together,  
217 these data indicate leakage of both mitochondrial and genomic DNA into the cytosol of cells  
218 infected with MNV.

219

220 To determine if this aberrant cytosolic DNA is able to induce IFNs, we transfected normalised  
221 amounts of extracted cytosolic DNA into RAW264.7 cells, and assessed for IFN- $\beta$  and ISG  
222 (viperin) expression using qPCR (Figure 5c). As shown in Figure 5d, there was a significant  
223 increase in IFN- $\beta$  and viperin in the cells transfected with cytosolic DNA from MNV-infected  
224 cells, compared to that from mock-infected cells, in a dose-dependent manner. This increased  
225 induction of IFN- $\beta$  was seen to be STING-dependent, as there was almost no induction of IFN-  
226  $\beta$  in STING<sup>-/-</sup> cells transfected with cytosolic DNA (Figure 5e). Altogether, our data indicate  
227 leakage of genomic and mitochondrial DNA into the cytosol of MNV-infected cells that can  
228 activate induction of IFNs.

229

### 230 ***The norovirus NS4 protein promotes the accumulation of cytosolic DNA***

231 Leakage of DNA into the cytosol of cells occurs in disparate ways. For example, mtDNA  
232 leakage in A549 cells was shown to occur downstream of IL-1 $\beta$  signalling [16]. Treatment of  
233 these cells with IL-1 $\beta$  was sufficient to cause mitochondrial leakage into the cytosol, activation  
234 of IRF3 and a resultant induction of IFNs and ISGs. Since MNV infection has recently been  
235 shown to induce IL-1 $\beta$  secretion [32], we hypothesised that this could therefore potentially  
236 explain the leakage of mtDNA in MNV-infected cells. To determine if this is the case,  
237 RAW264.7 cells were pre-treated with an IL-1 receptor antagonist (IL-1RA), IL-1 $\beta$ , or both,  
238 and subsequently infected with MNV1 at an MOI of 5. The cells were harvested 12 hours post  
239 infection and analysed for IFN- $\beta$  and viperin expression using qPCR. As shown in Figures S2a  
240 and S2b, we neither observed any significant decrease in IFN- $\beta$  or viperin induction in the  
241 presence of IL-1RA, nor did we see any induction of IFN- $\beta$  or viperin in cells treated with IL-  
242 1 $\beta$ . Additionally, while treatment of A549 cells with IL-1 $\beta$  did induce expression of IL-6, with a  
243 decrease in expression seen in cells pre-treated with IL-1RA, as expected (Figure S2c), in our  
244 hands there was no increase in IFN- $\beta$  induction in cells treated with IL-1 $\beta$  (Figure S2d).

245

246 Next, we considered if any of the structural and non-structural viral proteins is the cause of  
247 leakage of DNA into the cytosol. One likely candidate is the NS1-2 protein that was recently



248 shown to potentially have a viroporin activity [33]. We hypothesised that the NS1-2 protein, as  
249 a viroporin, may disrupt intracellular calcium homeostasis and eventually lead to mitochondrial  
250 leakage, similar to the M2 protein of Influenza A virus and the 2B protein of EMCV [12].  
251 Another candidate is the NS5 protein (VPg), which was shown to be a potential interactor of  
252 PARP1 and other DNA repair enzymes in a proteomics assay [34]. Sequestration of DNA  
253 repair enzymes by VPg in the cytosol might lead to depletion of the nuclear components of  
254 these enzymes, which could then promote the leakage of genomic DNA into the cytosol.  
255 Indeed expression of the norovirus VPg in cells leads to cell cycle arrest [35,36], a  
256 phenomenon that is also seen following depletion of DNA repair enzymes. To determine if any  
257 of these is relevant to norovirus biology, we transfected plasmids encoding individual proteins  
258 of MNV1 into HEK293T-CD300lf cells. We opted to use these cells due to their high  
259 transfection efficiencies, and like RAW264.7 cells, show a significant accumulation of genomic  
260 and mitochondrial DNA in the cytosol following infection with MNV (Figures 6a and 6b).  
261 Transfected cells were harvested after 24 hours and cytosolic DNA was assessed by qPCR.  
262 A significant increase in cytosolic DNA was seen in cells expressing NS4 compared to those  
263 expressing GFP (Figure 6c). No increase in cytosolic DNA was seen in cells expressing the  
264 NS1-2 protein, VPg, or any of the other MNV proteins (Figures 6c and S3), suggesting that  
265 the NS4 protein of MNV mediates accumulation of DNA in the cytosols of MNV-infected cells.

266

267 To determine if this function is conserved across the NS4 proteins of noroviruses, we explored  
268 leakage of DNA in cells expressing HuNoV NS4. For this, HEK293T-CD300lf cells were either  
269 mock-transfected, or transfected with plasmids encoding GFP, MNV1 NS4, or HuNoV GII.4  
270 NS4. The cells were harvested 24 hours post transfection and cytosolic DNA was assessed  
271 by qPCR. While no increase in cytosolic DNA was detected in GFP-expressing cells compared  
272 to mock, as expected, a significant increase was seen in cells expressing HuNoV NS4, similar  
273 to those expressing MNV NS4 (Figure 6d). Interestingly, we observed a higher proportion of  
274 mtDNA in cells expressing HuNoV NS4 compared to those expressing MNV NS4, although  
275 levels of genomic DNA remained largely the same. Altogether, these data indicate that NS4  
276 proteins of noroviruses are necessary and sufficient for mediating leakage of genomic and  
277 mitochondrial DNA into the cytosol.

278

## 279 **Discussion**

280 Data suggesting a role for STING in restricting RNA viruses are as old as the discovery of  
281 STING itself, and the first viral proteins shown to antagonize STING function are in fact  
282 encoded by RNA viruses [15]. In this study we explored the potential role of STING in the IFN

283 responses to norovirus infection. There was a substantial impairment of IFN responses and a  
284 corresponding increase in viral replication in norovirus-infected primary cells and cell lines  
285 following treatment with small molecule inhibitors of STING, as well as a decrease in induction  
286 of IFNs and ISGs in norovirus-infected STING<sup>-/-</sup> cells, as well as cGAS<sup>-/-</sup> and IFI16<sup>-/-</sup> cells. Both  
287 cGAS and IFI16 can sense the presence of DNA in the cytosol [1] and activate an IFN  
288 induction signalling cascade upstream of STING. IFI16 has also been shown to be able to  
289 sense viral RNA [37], positively regulates cGAS-STING signalling [38,39], and promotes both  
290 DNA or RNA virus-induced IFN transcription in the nucleus [40]. Although STING mainly  
291 functions as an adapter protein in intracellular detection of foreign DNA, it has been shown to  
292 play important roles in the restriction of some RNA viruses through various independent  
293 mechanisms (recently reviewed by Maringer *et al.* [15], Aguirre *et al.* [41], Zevini *et al.* [42],  
294 and Ni *et al.* [43]). For example, it has been shown that STING can promote fusion-mediated  
295 IFN induction in cells infected with Influenza A virus in a manner independent of cGAS [44],  
296 and facilitate IFN induction downstream of cGAS in a manner dependent on the viral M2-  
297 mediated leakage of mtDNA [12]. In cells infected with DENV, membrane recruitment to  
298 replication complexes likely leads to leakage of mtDNA that triggers IFN induction via STING,  
299 in a process contingent on cGAS activation [11]. Recently, it was also demonstrated that  
300 STING can inhibit host and viral translation in cells infected with a wide variety of RNA viruses  
301 in a RIG-I dependent manner [14]. In addition, at least for JEV, IFN induction is largely  
302 dependent on a RIG-I/STING-dependent pathway [45]. And lastly, as were preparing this  
303 manuscript for submission, another group also published data that corroborated ours, showing  
304 a role for cGAS and STING in IFN responses against MNV, using knockout and  
305 overexpression assays [46].

306

307 The discovery of the role for the cGAS-STING pathway in the restriction of norovirus  
308 replication is significant, and potentially broadens the current MDA5/MAVS/IFN-centric  
309 understanding of the innate immune restriction of noroviruses to one that encompasses both  
310 IFN-dependent and independent pathways (Figure 7). For instance, STING can inhibit  
311 replication of RNA viruses via translation shutoff [14]. Since STING is itself an ISG [47], this  
312 could explain a previously described ability of type I IFNs to inhibit translation of MNV proteins  
313 independent of PKR [48]. STING is also involved in inflammasome activation following  
314 detection of pathogens, and this knowledge could therefore facilitate future studies of the  
315 complex relationship between noroviruses and commensal bacteria [49,50]. Importantly, this  
316 also potentially explains the discrepancy between *in vivo* and *in vitro* results from studies on  
317 IFN responses to the human norovirus. For example, studies in Huh7 and 293FT cells have  
318 shown no IFN responses to HuNoV [51,52], while human challenge studies [53], studies in

319 animal models [54,55], and *in vitro* studies in organoids [56–58], and replicon-containing cell  
320 lines [31] have all demonstrated induction of IFNs following infection. Given that both Huh7  
321 and 293FT cells have impaired cGAS-STING pathways [29,59,60], our data demonstrating a  
322 role of this pathway in restriction of noroviruses harmonises these various otherwise conflicting  
323 data.

324

325 We considered if the NS1-2 protein was the cause of leakage of DNA into the cytosol given  
326 that it has been suggested to be a viroporin [33]. The M2 protein of Influenza A virus and the  
327 2B protein of EMCV have been shown to mediate leakage of mtDNA by upsetting the  
328 intracellular calcium balance in a manner dependent on their viroporin activity [12]. We also  
329 considered the NS5 protein (VPg), a potential interactor of PARP1 and other DNA repair  
330 enzymes [34]. We hypothesized that sequestration of DNA repair enzymes by VPg in the  
331 cytosol may perhaps lead to depletion of the nuclear components of these enzymes, which in  
332 turn could lead to leakage of genomic DNA into the cytosol. This hypothesis was supported  
333 by previous studies showing that expression of the norovirus VPg in cells leads to cell cycle  
334 arrest via a yet unknown mechanism [35,36,61], given that cell cycle arrest can be a  
335 consequence of compromised DNA repair. However, our data has shown that none of these  
336 proteins induce accumulation of cytosolic DNA independently. A third hypothesis we  
337 considered for the mechanism of DNA leakage into the cytosol of infected cells was IL-1 $\beta$   
338 signalling. Leakage of immunostimulatory mtDNA in West Nile virus-infected cells was  
339 previously shown to likely occur downstream of IL-1 $\beta$  signalling via an unknown mechanism  
340 [16,62]. Since MNV was recently shown to induce significant release of IL-1 $\beta$  *in vivo* [32], we  
341 considered if this pathway was also activated in norovirus-infected cells. However, we were  
342 not able to demonstrate mtDNA leakage in cells treated with IL-1 $\beta$ , and treatment with an IL-  
343 1RA did not affect IFN induction in MNV-infected cells.

344

345 Our finding that infection promotes leakage of genomic DNA is surprising, but not unexpected,  
346 given the substantial widespread membrane reorganisation that occurs in infected cells during  
347 the formation of virus replication complexes [63,64]. We have shown that expression of the  
348 viral NS4 protein is sufficient to cause this accumulation of DNA in the cytosol. Interestingly,  
349 a previous study demonstrated that the NS4 protein is uniquely able to form membranous  
350 complexes when overexpressed in cells [64]. Whether the ability of NS4 to promote  
351 accumulation of cytosolic DNA is related to its membrane recruitment function remains to be  
352 tested. Indeed the presence of nuclear envelope markers on norovirus replication complexes  
353 has not been previously explored. While leakage of genomic DNA into the cytosol of cells

354 infected with RNA viruses has not been demonstrated until now, it is seen in cancer cells  
355 [17,18] and following irradiation [19] or exposure to chemotherapeutic agents such as  
356 etoposide [20]. Indeed, the efficacy of some anticancer drugs has been shown to be  
357 dependent on their ability to activate STING in this manner [21,22,65]. Given the widespread  
358 reorganisation of host cell architecture during viral replication, we expect that many more RNA  
359 viruses likely trigger leakage of genomic DNA into the cytosol.

360

361 Several RNA viruses encode proteins that counteract STING-dependent host antiviral  
362 responses [15]. The Dengue virus NS2B and Chikungunya virus capsid proteins promote  
363 degradation of cGAS in infected cells, for example [11,13]. The Influenza A virus NS1 protein  
364 binds to mtDNA and renders it less immunostimulatory [12]. Further work is required to  
365 determine if noroviruses have mechanisms to counteract or avoid this pathway. One potential  
366 target could be the GTPase-activating protein SH3 domain-binding protein 1 (G3BP1). Our  
367 group and others have recently shown that G3BP1 is sequestered within replication  
368 complexes in infected cells [34,66,67]. Since it was also recently shown to contribute to DNA  
369 sensing by cGAS [68–70], it is entirely possible that its sequestration in replication complexes  
370 also dampens its contribution to cGAS activation. Further work is however required to  
371 determine if this is the case.

372

373 In this work, we have shown a role for cGAS, IFI16 and STING in the restriction of noroviruses,  
374 and demonstrated for the first time the role of the host genomic DNA as a damage-associated  
375 molecular pattern in cells infected with an RNA virus. We have demonstrated accumulation of  
376 nuclear DNA, and to a lesser extent mtDNA, in the cytosol of infected cells, likely driven by  
377 the viral NS4 protein. Further work is required to determine the exact mechanism of this DNA  
378 leakage, as well as potential mechanisms of evasion by the viruses.

379

380

## 381 **Materials and methods**

### 382 **Cells**

383 RAW264.7, BV2, HEK293T, and HeLa cells were maintained at 37°C in complete Dulbecco's  
384 Modified Eagle Medium (DMEM, Sigma Aldrich) containing 4500mg/ml glucose, sodium  
385 bicarbonate, and sodium pyruvate, and supplemented with 10% heat-inactivated Fetal Bovine  
386 Serum (HyClone), 10U/ml of penicillin, 100 µg/ml of streptomycin, 2mM L-glutamine (Sigma  
387 Aldrich), and non-essential amino acids (Sigma Aldrich). HEK293T and HeLa cells used in  
388 this work were generously provided by Dr Susanna M. Colaco (University of Cambridge). BSR-  
389 T7 cells, a kind gift from Karl-Klaus Conzelmann (Ludwig Maximilians University, Munich)  
390 derived from Baby Hamster Kidney (BHK) cells and expressing the T7 RNA polymerase, were  
391 maintained in complete DMEM supplemented with 0.5 mg/ml G418 (Invivogen). RAW-Lucia  
392 ISG wild-type (Invivogen, rawl-isg), MAVS-KO (Invivogen, rawl-komavs), STING-KO  
393 (Invivogen, rawl-kostg), MDA5-KO (Invivogen, rawl-komda5), cGAS-KO (Invivogen, rawl-  
394 kocgas), and IFI16-KO (Invivogen, rawl-koif16) were purchased from Invivogen.

395

396 Bone marrow-derived macrophages (BMDMs) were differentiated from bone marrow cells of  
397 C57BL/6 mice as previously described [71]. Briefly, bone marrow cells were seeded on non-  
398 treated culture plates in complete DMEM supplemented with 10% CMG14 culture supernatant  
399 which contains M-CSF. Fresh medium was added every 3 days and cells were harvested and  
400 used for experiments on day 9 or 10. This work was carried out in accordance with regulations  
401 of The Animals (Scientific Procedures) Act 1986 [72] and the ARRIVE guidelines [73]. All  
402 procedures were approved by the University of Cambridge Animal Welfare and Ethical Review  
403 Body (AWERB) and the UK Home Office and carried out under the Home Office project licence  
404 PPL 70/7689.

405

### 406 **Plasmids**

407 Plasmids used in this work are listed in Table 1.

408

### 409 **Lentivirus transduction**

410 For shRNA transduction, Mission shRNA plasmids (Sigma Aldrich) were transfected together  
411 with pMDLg/pRRE, pRSV-Rev, and pMD2.G plasmids into HEK293T cells using  
412 Lipofectamine 2000. Pooled lentiviral supernatants harvested on days 2 and 3 were used to

413 infect RAW264.7 cells. Puromycin (Invitrogen) selection was started 72 hours post-infection.  
414 The cells were cultured in 2 µg/ml puromycin until all the control cells were dead and were  
415 then maintained in 5 µg/ml puromycin.

416

417 For CD300lf lentiviral transduction, the pFS669IG plasmid encoding the mouse CD300lf was  
418 transfected together with pMDLg/pRRE, pRSV-Rev, and pMD2.G plasmids into HEK293T  
419 cells using Lipofectamine 2000. Pooled lentiviral supernatants harvested on days 2 and 3 were  
420 used to infect HeLa and HEK293T cells. CD300lf-transduced HeLa and HEK293T cells were  
421 subsequently selected using 100 µg/ml Hygromycin (Invitrogen), starting 72 hours post-  
422 infection.

423

424 For generation of STING<sup>-/-</sup> RAW264.7 cells, the LentiCRISPRv2-based plasmid pAJ221IG, co-  
425 encoding the Cas9 nuclease and single guide RNA targeting mouse STING (sequence:  
426 AGCAAAACATCGACCGTGC, from Storek et al. [74]), was transfected together with  
427 pMDLg/pRRE, pRSV-Rev, and pMD2.G plasmids into HEK293T cells using Lipofectamine  
428 2000. Pooled lentiviral supernatants harvested on days 2 and 3 were used to infect RAW264.7  
429 cells. Puromycin (Invitrogen) selection was started 72 hours post-infection. The cells were  
430 cultured in 2 µg/ml puromycin until all the control cells were dead and were then maintained  
431 in 5 µg/ml puromycin. Single cells were FACS sorted into individual wells of 96-well plates  
432 containing conditioned media by the NIHR Cambridge BRC Cell Phenotyping Hub. Clones of  
433 cells were screened 6 weeks later by western blotting.

434

### 435 **Reverse genetics**

436 The MNV1 virus was prepared via reverse genetics as previously described [75,76]. Briefly,  
437  $1.5 \times 10^6$  BSR-T7 cells were seeded in a 6-well plate and incubated at 37°C for 3 hours. The  
438 cells were then infected with Fowlpox virus (FPV)-T7 at an MOI of 0.5 pfu/cell and incubated  
439 at 37°C for 2 hours. Then, 1µg of the pT7:MNV-1\_3'Rz or the pT7:MNV-1\_3'Rz\_M1 MNV  
440 cDNA clones (for the wild type or VF1-deficient M1 mutant, respectively) were transfected  
441 using Lipofectamine 2000, according to the manufacturer's instructions. The plate was  
442 incubated at 37°C for 2 days, freeze-thawed once (at -80°C overnight or longer), and titred by  
443 TCID50.

444

### 445 **TCID50**

446 TCID50 by cytopathic effect (CPE) was carried out as previously described [75]. Briefly, 1:10  
447 serial dilutions of the virus preparations were made in cell culture media and aliquoted into  
448 wells of a 96-well plate, each in 4 replicates of 50µl. Then,  $2 \times 10^4$  BV2 cells in 100µl of cell  
449 culture media was added to each well and the plate was incubated at 37°C for 5 days. The  
450 cells were subsequently assessed for CPE, and TCID50/ml was calculated using the  
451 Spearman & Kärber algorithm [77].

452

### 453 **Cell stimulation**

454 Poly (I:C) (P1530, Sigma) and poly (dA:dT) (P1537, Sigma) transfections were carried out on  
455 cells pre-seeded overnight in 24-well plates using Lipofectamine 2000 (Invitrogen), according  
456 to the manufacturer's protocol. Animal-free recombinant IL-1RA (Peprotech, AF-200-01RA),  
457 mouse IL-1β (Peprotech, AF-211-11B) and human IL-1β (Peprotech, AF-200-01B) were used  
458 for the experiments in Figure S2.

459

### 460 **MNV infection**

461 Cells were incubated with the virus inoculum at the appropriate MOI on an end-to-end rotor at  
462 37°C for an hour, then washed twice with fresh media, transferred to appropriate culture plates,  
463 and incubated at 37°C.

464

### 465 **Small molecule inhibition of STING**

466 For experiments involving STING inhibition, cells were pre-treated in DMSO (Sigma), C-176  
467 (Focus Biomolecules), or H-151 (Focus Biomolecules) for 2 hours before infection or  
468 transfection with poly (I:C) or poly (dA:dT), and the drugs are supplemented in the media  
469 onwards until the cells were harvested for end-point assays.

470

### 471 **Luciferase assay**

472 RAW-Lucia ISG cells were infected as described. Clarified supernatants were harvested at 18  
473 hours post infection, mixed with the Quanti-luc Gold reagent (Invivogen, rep-qlcg1) in a 1:1  
474 ratio, and analysed on a Glomax Navigator Microplate Luminometer (Promega).

475

### 476 **Western blotting**

477 Cells were washed in ice-cold PBS twice, resuspended in RIPA buffer (150mM NaCl, 1% NP-  
478 40, 0.5% Na deoxycholate, 0.1% SDS, 25mM Tris-HCl pH 7.4) supplemented with a protease  
479 inhibitor cocktail (and a phosphatase inhibitor cocktail when phospho-proteins were of  
480 interest), and kept on ice for 20 minutes. The sample was pipetted up and down several times  
481 and was centrifuged immediately at 10,000 x g for 10 minutes at 4°C. The supernatant was  
482 transferred to a new tube and the pellet was discarded. The sample was quantified using the  
483 BCA assay (Thermo Scientific) according to the manufacturer's recommendations. The  
484 sample was then mixed with SDS polyacrylamide gel electrophoresis (PAGE) sample buffer  
485 (2% SDS, 10% glycerol, 0.002% bromophenol blue, 0.0625M Tris-Cl pH 6.8, 5% 2-  
486 mercaptoethanol), heated at 95°C for 5 minutes, and kept at -20°C or used immediately for  
487 SDS PAGE. Transfers were made onto 0.45µm nitrocellulose membranes. The membranes  
488 were blocked in 5% milk PBST for 1 hour at room temperature, and the primary and secondary  
489 antibodies were incubated at 4°C overnight and 1hour at room temperature respectively, with  
490 three 5-minute washes in between incubations. The membranes were subsequently scanned  
491 on an Odyssey CLx imager (LI-COR) and the results were analysed using the Image Studio  
492 Lite software version 5.2.5 (LI-COR). Antibodies used in this work are listed in Table 2.

493

#### 494 **Relative RT-qPCR**

495 RNA extraction with on-column DNase treatment were done using the GenElute Mammalian  
496 Total RNA Miniprep Kit (Sigma-Aldrich) according to the manufacturer's protocol. cDNA was  
497 synthesized using the M-MLV Reverse Transcriptase (Promega), according to the  
498 manufacturer's protocol. qPCR was carried out using a 2X SYBR Green mastermix containing  
499 2.5mM MgCl<sub>2</sub>, 400µM dNTPs, 1/10,000 SybrGreen (Molecular Probes), 1M Betaine (Sigma),  
500 0.05U/µl of Gold Star polymerase (Eurogentec), 1/5 10X Reaction buffer (750 mM Tris-HCl  
501 pH 8.8, 200 mM [NH<sub>4</sub>]<sub>2</sub>SO<sub>4</sub>, 0.1 % [v/v] Tween 20, Without MgCl<sub>2</sub>), and ROX Passive  
502 Reference buffer (Eurogentec), and ran on a ViiA 7 Real-Time PCR System (ThermoFisher  
503 Scientific), with a 15-second 95°C denaturation step and a 1-minute 60°C annealing/extension  
504 step for 40 cycles. Relative gene expression was calculated using the Livak method ( $\Delta\Delta C_t$ )  
505 relative to mock-transfected conditions [78], and normalized to a house keeping gene (*Gapdh*  
506 for all the mouse samples, and  $\beta$ -actin for the human samples). Primers used in this work are  
507 listed in Table 3.

508

#### 509 **Cell fractionation and cytosolic DNA assessment**



510 Cell fractionation for cytosolic DNA assessment was carried out using a protocol modified from  
511 Moriyama et al. [12]. Briefly, the cells were washed in 1 ml of ice-cold PBS. Cells were then  
512 resuspended in 600µl digitonin lysis buffer (150 mM NaCl, 50 mM HEPES pH 7.4, and  
513 20 µg/ml digitonin), out of which 100µl was set aside for analysis by western blot, and 100µl  
514 was set aside as the whole cell fraction. The remaining 400µl was centrifuged at 1,000 x g for  
515 3 minutes, and the supernatant transferred to a new tube. This was repeated twice, and then  
516 the supernatant was centrifuged at 17,000 x g for 10 minutes and transferred into a new tube.  
517 An RNase digestion was carried out on this cytosolic fraction and the whole cell fraction by  
518 adding 2.5 µl each (1.25 units) of the RNase Cocktail Enzyme Mix (Invitrogen, AM2286) and  
519 incubated at 37°C for 2 hours. DNA was then extracted from the cytosolic fraction using the  
520 QIAquick Nucleotide Removal kit (QIAGEN) and from the whole cell fraction using the QIAamp  
521 DNA Mini Kit (QIAGEN). Both cytosolic and whole cell fractions were eluted in 100µl and  
522 diluted 1:10 in water before assessment by qPCR. Primers used for qPCR are listed in Table  
523 4.

524

#### 525 **Statistical analysis and software**

526 Prism 6.0 (Graph Pad) was used for all statistical analysis, and one-way repeated measures  
527 ANOVA with Bonferroni multiple comparisons tests was applied to determine statistical  
528 significance, unless where indicated otherwise. In all cases, 'ns', \*, \*\*, \*\*\*, and \*\*\*\* are used  
529 to denote  $p > 0.05$ ,  $p \leq 0.05$ ,  $p \leq 0.01$ ,  $p \leq 0.001$  and  $p \leq 0.0001$  respectively. The Image J software  
530 was used for all confocal micrograph preparation and Image Studio Lite 5.2 was used for  
531 western blot quantification. Clustal Omega was used for all sequence alignments, and  
532 Snapgene 4.2 was used for primer design and cloning strategies.

533

534

535 **Author contributions**

536 ASJ, FS and IGG were involved in the conceptualization of the project. IGG secured funding  
537 for and supervised the work. ASJ, FS, YC, SEA, MH, IG, and RI designed and conducted the  
538 experiments, and analysed the results. ASJ wrote the initial draft of the manuscript. All authors  
539 were involved in the interpretation of the results and writing of the manuscript.

540

541 **Competing interests**

542 No competing interests were disclosed.

543

544 **Grant information**

545 This research was funded in part by the Wellcome Trust [207498/Z/17/Z]. FS was funded by  
546 a Biotechnology and Biological Sciences Research Council (BBSRC) sLoLa grant  
547 (BB/K002465/1). For the purpose of open access, a CC BY public copyright licence will apply  
548 to any Author Accepted Manuscript version arising from this work.

549

550 **Acknowledgements**

551 We thank the NIHR Cambridge BRC Cell Phenotyping Hub for providing cell sorting services.

552

553

554

555 **References**

- 556 1. Carty, M.; Guy, C.; Bowie, A.G. Detection of Viral Infections by Innate Immunity.  
557 *Biochem. Pharmacol.* 2021, 183.
- 558 2. Karst, S.M.; Wobus, C.E.; Goodfellow, I.G.; Green, K.Y.; Virgin, H.W. Advances in  
559 Norovirus Biology. *Cell Host Microbe* 2014, 15, 668–680,  
560 doi:10.1016/j.chom.2014.05.015.
- 561 3. Pires, S.M.; Fischer-Walker, C.L.; Lanata, C.F.; Devleeschauwer, B.; Hall, A.J.; Kirk,  
562 M.D.; Duarte, A.S.R.; Black, R.E.; Angulo, F.J. Aetiology-specific estimates of the  
563 global and regional incidence and mortality of diarrhoeal diseases commonly  
564 transmitted through food. *PLoS One* 2015, 10, doi:10.1371/journal.pone.0142927.
- 565 4. Lopman, B.A.; Steele, D.; Kirkwood, C.D.; Parashar, U.D. The Vast and Varied Global  
566 Burden of Norovirus: Prospects for Prevention and Control. *PLOS Med.* 2016, 13,  
567 e1001999, doi:10.1371/journal.pmed.1001999.
- 568 5. Bányai, K.; Estes, M.K.; Martella, V.; Parashar, U.D. Viral gastroenteritis. *Lancet*  
569 2018, 392, 175–186, doi:10.1016/S0140-6736(18)31128-0.
- 570 6. McCartney, S.A.; Thackray, L.B.; Gitlin, L.; Gilfillan, S.; Virgin IV, H.W.; Colonna, M.;  
571 Colonna, M. MDA-5 Recognition of a Murine Norovirus. *PLoS Pathog.* 2008, 4,  
572 e1000108, doi:10.1371/journal.ppat.1000108.
- 573 7. MacDuff, D.A.; Baldrige, M.T.; Qaqish, A.M.; Nice, T.J.; Darbandi, A.D.; Hartley,  
574 V.L.; Peterson, S.T.; Miner, J.J.; Iwai, K.; Virgin, H.W. HOIL1 Is Essential for the  
575 Induction of Type I and III Interferons by MDA5 and Regulates Persistent Murine  
576 Norovirus Infection. *J. Virol.* 2018, 92, doi:10.1128/JVI.01368-18.
- 577 8. Wang, P.; Zhu, S.; Yang, L.; Cui, S.; Pan, W.; Jackson, R.; Zheng, Y.; Rongvaux, A.;  
578 Sun, Q.; Yang, G.; et al. Nlrp6 regulates intestinal antiviral innate immunity. *Science*  
579 2015, 350, 826–30, doi:10.1126/science.aab3145.
- 580 9. Mumphrey, S.M.; Changotra, H.; Moore, T.N.; Heimann-Nichols, E.R.; Wobus, C.E.;  
581 Reilly, M.J.; Moghadamfalahi, M.; Shukla, D.; Karst, S.M. Murine norovirus 1 infection  
582 is associated with histopathological changes in immunocompetent hosts, but clinical  
583 disease is prevented by STAT1-dependent interferon responses. *J. Virol.* 2007, 81,  
584 3251–63, doi:10.1128/JVI.02096-06.
- 585 10. Wobus, C.E.; Karst, S.M.; Thackray, L.B.; Chang, K.O.; Sosnovtsev, S. V; Belliot, G.;  
586 Krug, A.; Mackenzie, J.M.; Green, K.Y.; Virgin, H.W. Replication of Norovirus in cell

- 587 culture reveals a tropism for dendritic cells and macrophages. *PLoS Biol.* **2004**, 2,  
588 e432, doi:10.1371/journal.pbio.0020432.
- 589 11. Aguirre, S.; Luthra, P.; Sanchez-Aparicio, M.T.; Maestre, A.M.; Patel, J.; Lamothe, F.;  
590 Fredericks, A.C.; Tripathi, S.; Zhu, T.; Pintado-Silva, J.; et al. Dengue virus NS2B  
591 protein targets cGAS for degradation and prevents mitochondrial DNA sensing during  
592 infection. *Nat. Microbiol.* **2017**, 2, 17037, doi:10.1038/nmicrobiol.2017.37.
- 593 12. Moriyama, M.; Koshiba, T.; Ichinohe, T. Influenza A virus M2 protein triggers  
594 mitochondrial DNA-mediated antiviral immune responses. *Nat. Commun.* **2019**, 10,  
595 doi:10.1038/S41467-019-12632-5.
- 596 13. Webb, L.G.; Veloz, J.; Pintado-Silva, J.; Zhu, T.; Rangel, M. V.; Mutetwa, T.; Zhang,  
597 L.; Bernal-Rubio, D.; Figueroa, D.; Carrau, L.; et al. Chikungunya virus antagonizes  
598 cGAS-STING mediated type-I interferon responses by degrading cGAS. *PLOS*  
599 *Pathog.* **2020**, 16, e1008999, doi:10.1371/JOURNAL.PPAT.1008999.
- 600 14. Franz, K.M.; Neidermyer, W.J.; Tan, Y.-J.; Whelan, S.P.J.; Kagan, J.C. STING-  
601 dependent translation inhibition restricts RNA virus replication. *Proc. Natl. Acad. Sci.*  
602 **2018**, 115, E2058–E2067, doi:10.1073/pnas.1716937115.
- 603 15. Maringer, K.; Fernandez-Sesma, A. Message in a bottle: lessons learned from  
604 antagonism of STING signalling during RNA virus infection. *Cytokine Growth Factor*  
605 *Rev.* **2014**, 25, 669–679, doi:10.1016/j.cytogfr.2014.08.004.
- 606 16. Aarreberg, L.D.; Esser-Nobis, K.; Driscoll, C.; Shuvarikov, A.; Roby, J.A.; Gale, M.  
607 Interleukin-1 $\beta$  Induces mtDNA Release to Activate Innate Immune Signaling via  
608 cGAS-STING. *Mol. Cell* **2019**, 74, 801-815.e6, doi:10.1016/j.molcel.2019.02.038.
- 609 17. Shen, Y.J.; LeBert, N.; Chitre, A.A.; Koo, C.X.E.; Nga, X.H.; Ho, S.S.W.; Khatoo, M.;  
610 Tan, N.Y.; Ishii, K.J.; Gasser, S. Genome-Derived Cytosolic DNA Mediates Type I  
611 Interferon-Dependent Rejection of B Cell Lymphoma Cells. *Cell Rep.* **2015**, 11, 460–  
612 473, doi:10.1016/J.CELREP.2015.03.041.
- 613 18. Li, T.; Chen, Z.J. The cGAS–cGAMP–STING pathway connects DNA damage to  
614 inflammation, senescence, and cancer. *J. Exp. Med.* **2018**, 215, 1287–1299,  
615 doi:10.1084/JEM.20180139.
- 616 19. Durante, M.; Formenti, S.C. Radiation-Induced Chromosomal Aberrations and  
617 Immunotherapy: Micronuclei, Cytosolic DNA, and Interferon-Production Pathway.  
618 *Front. Oncol.* **2018**, 0, 192, doi:10.3389/FONC.2018.00192.

- 619 20. Dunphy, G.; Flannery, S.M.; Almine, J.F.; Connolly, D.J.; Paulus, C.; Jønsson, K.L.;  
620 Jakobsen, M.R.; Nevels, M.M.; Bowie, A.G.; Unterholzner, L. Non-canonical  
621 Activation of the DNA Sensing Adaptor STING by ATM and IFI16 Mediates NF- $\kappa$ B  
622 Signaling after Nuclear DNA Damage. *Mol. Cell* **2018**, *71*, 745-760.e5,  
623 doi:10.1016/j.molcel.2018.07.034.
- 624 21. Wang, C.; Du, M.; Huang, D.; Huang, K.; Huang, K. Inhibition of PARP1 Increases  
625 IRF-dependent Gene Transcription in Jurkat Cells. *Curr. Med. Sci. 2019 393* **2019**,  
626 *39*, 356–362, doi:10.1007/S11596-019-2043-1.
- 627 22. Kim, C.; Wang, X.D.; Yu, Y. Parp1 inhibitors trigger innate immunity via parp1  
628 trapping-induced DNA damage response. *Elife* **2020**, *9*, 1–47,  
629 doi:10.7554/ELIFE.60637.
- 630 23. McFadden, N.; Bailey, D.; Carrara, G.; Benson, A.; Chaudhry, Y.; Shortland, A.;  
631 Heeney, J.; Yarovinsky, F.; Simmonds, P.; Macdonald, A.; et al. Norovirus regulation  
632 of the innate immune response and apoptosis occurs via the product of the alternative  
633 open reading frame 4. *PLoS Pathog.* **2011**, *7*, e1002413,  
634 doi:10.1371/journal.ppat.1002413.
- 635 24. Zhu, S.; Regev, D.; Watanabe, M.; Hickman, D.; Moussatche, N.; Jesus, D.M.; Kahan,  
636 S.M.; Naphine, S.; Brierley, I.; Hunter, R.N.; et al. Identification of Immune and Viral  
637 Correlates of Norovirus Protective Immunity through Comparative Study of Intra-  
638 Cluster Norovirus Strains. *PLoS Pathog.* **2013**, *9*, e1003592,  
639 doi:10.1371/journal.ppat.1003592.
- 640 25. Zhang, X.; Edwards, J.P.; Mosser, D.M. The expression of exogenous genes in  
641 macrophages: obstacles and opportunities. *Methods Mol. Biol.* **2009**, *531*, 123–43,  
642 doi:10.1007/978-1-59745-396-7\_9.
- 643 26. Keller, A.-A.; Maeß, M.B.; Schnoor, M.; Scheiding, B.; Lorkowski, S. Transfecting  
644 Macrophages. In *Methods in molecular biology (Clifton, N.J.)*; 2018; Vol. 1784, pp.  
645 187–195.
- 646 27. Haga, K.; Fujimoto, A.; Takai-Todaka, R.; Miki, M.; Doan, Y.H.; Murakami, K.;  
647 Yokoyama, M.; Murata, K.; Nakanishi, A.; Katayama, K. Functional receptor  
648 molecules CD300lf and CD300ld within the CD300 family enable murine noroviruses  
649 to infect cells. *Proc. Natl. Acad. Sci.* **2016**, *113*, E6248–E6255,  
650 doi:10.1073/pnas.1605575113.
- 651 28. Orchard, R.C.; Wilen, C.B.; Doench, J.G.; Baldrige, M.T.; McCune, B.T.; Lee, Y.-

- 652 C.J.; Lee, S.; Pruett-Miller, S.M.; Nelson, C.A.; Fremont, D.H.; et al. Discovery of a  
653 proteinaceous cellular receptor for a norovirus. *Science (80-. )*. **2016**, *353*, 933–936,  
654 doi:10.1126/science.aaf1220.
- 655 29. Burdette, D.L.; Monroe, K.M.; Sotelo-Troha, K.; Iwig, J.S.; Eckert, B.; Hyodo, M.;  
656 Hayakawa, Y.; Vance, R.E. STING is a direct innate immune sensor of cyclic di-GMP.  
657 *Nature* **2011**, *478*, 515–518, doi:10.1038/nature10429.
- 658 30. Haag, S.M.; Gulen, M.F.; Reymond, L.; Gibelin, A.; Abrami, L.; Decout, A.; Heymann,  
659 M.; van der Goot, F.G.; Turcatti, G.; Behrendt, R.; et al. Targeting STING with  
660 covalent small-molecule inhibitors. *Nature* **2018**, *559*, 269–273, doi:10.1038/s41586-  
661 018-0287-8.
- 662 31. Arthur, S.E.; Sorgeloos, F.; Hosmillo, M.; Goodfellow, I.G. Epigenetic suppression of  
663 interferon lambda receptor expression leads to enhanced human norovirus replication  
664 in vitro. *MBio* **2019**, *10*, doi:10.1128/mBio.02155-19.
- 665 32. Dubois, H.; Sorgeloos, F.; Sarvestani, S.T.; Martens, L.; Saeys, Y.; Mackenzie, J.M.;  
666 Lamkanfi, M.; van Loo, G.; Goodfellow, I.; Wullaert, A. Nlrp3 inflammasome activation  
667 and Gasdermin D-driven pyroptosis are immunopathogenic upon gastrointestinal  
668 norovirus infection. *PLOS Pathog.* **2019**, *15*, e1007709,  
669 doi:10.1371/journal.ppat.1007709.
- 670 33. Strtak, A.C.; Perry, J.L.; Sharp, M.N.; Chang-Graham, A.L.; Farkas, T.; Hyser, J.M.  
671 Recovirus NS1-2 Has Viroporin Activity That Induces Aberrant Cellular Calcium  
672 Signaling To Facilitate Virus Replication. *mSphere* **2019**, *4*,  
673 doi:10.1128/MSPHERE.00506-19.
- 674 34. Hosmillo, M.; Lu, J.; McAllaster, M.R.; Eaglesham, J.B.; Wang, X.; Emmott, E.;  
675 Domingues, P.; Chaudhry, Y.; Fitzmaurice, T.J.; Tung, M.K.; et al. Noroviruses  
676 subvert the core stress granule component G3BP1 to promote viral VPg-dependent  
677 translation. *Elife* **2019**, *8*, doi:10.7554/eLife.46681.
- 678 35. Davies, C.; Ward, V.K. Expression of the NS5 (VPg) Protein of Murine Norovirus  
679 Induces a G1/S Phase Arrest. *PLoS One* **2016**, *11*, e0161582,  
680 doi:10.1371/JOURNAL.PONE.0161582.
- 681 36. McSweeney, A.; Davies, C.; Ward, V.K. Cell Cycle Arrest is a Conserved Function of  
682 Norovirus VPg Proteins. *Viruses 2019, Vol. 11, Page 217* **2019**, *11*, 217,  
683 doi:10.3390/V11030217.
- 684 37. Jiang, Z.; Wei, F.; Zhang, Y.; Wang, T.; Gao, W.; Yu, S.; Sun, H.; Pu, J.; Sun, Y.;

- 685 Wang, M.; et al. IFI16 directly senses viral RNA and enhances RIG-I transcription and  
686 activation to restrict influenza virus infection. *Nat. Microbiol.* 2021 67 **2021**, 6, 932–  
687 945, doi:10.1038/s41564-021-00907-x.
- 688 38. Jønsson, K.L.; Laustsen, A.; Krapp, C.; Skipper, K.A.; Thavachelvam, K.; Hotter, D.;  
689 Egedal, J.H.; Kjolby, M.; Mohammadi, P.; Prabakaran, T.; et al. IFI16 is required for  
690 DNA sensing in human macrophages by promoting production and function of  
691 cGAMP. *Nat. Commun.* **2017**, 8, 14391, doi:10.1038/ncomms14391.
- 692 39. Almine, J.F.; O'Hare, C.A.J.; Dunphy, G.; Haga, I.R.; Naik, R.J.; Atrih, A.; Connolly,  
693 D.J.; Taylor, J.; Kelsall, I.R.; Bowie, A.G.; et al. IFI16 and cGAS cooperate in the  
694 activation of STING during DNA sensing in human keratinocytes. *Nat. Commun.*  
695 **2017**, 8, 14392, doi:10.1038/ncomms14392.
- 696 40. Thompson, M.R.; Sharma, S.; Atianand, M.; Jensen, S.B.; Carpenter, S.; Knipe, D.M.;  
697 Fitzgerald, K.A.; Kurt-Jones, E.A. Interferon  $\gamma$ -inducible Protein (IFI) 16  
698 Transcriptionally Regulates Type I Interferons and Other Interferon-stimulated Genes  
699 and Controls the Interferon Response to both DNA and RNA Viruses \*. *J. Biol. Chem.*  
700 **2014**, 289, 23568–23581, doi:10.1074/JBC.M114.554147.
- 701 41. Aguirre, S.; Fernandez-Sesma, A. Collateral Damage during Dengue Virus Infection:  
702 Making Sense of DNA by cGAS. *J. Virol.* **2017**, 91, doi:10.1128/JVI.01081-16.
- 703 42. Zevini, A.; Olagnier, D.; Hiscott, J. Crosstalk between Cytoplasmic RIG-I and STING  
704 Sensing Pathways. *Trends Immunol.* **2017**, 38, 194–205, doi:10.1016/j.it.2016.12.004.
- 705 43. Ni, G.; Ma, Z.; Damania, B. cGAS and STING: At the intersection of DNA and RNA  
706 virus-sensing networks. *PLOS Pathog.* **2018**, 14, e1007148,  
707 doi:10.1371/journal.ppat.1007148.
- 708 44. Holm, C.K.; Rahbek, S.H.; Gad, H.H.; Bak, R.O.; Jakobsen, M.R.; Jiang, Z.; Hansen,  
709 A.L.; Jensen, S.K.; Sun, C.; Thomsen, M.K.; et al. Influenza A virus targets a cGAS-  
710 independent STING pathway that controls enveloped RNA viruses. *Nat. Commun.*  
711 **2016**, 7, 10680, doi:10.1038/ncomms10680.
- 712 45. Nazmi, A.; Mukhopadhyay, R.; Dutta, K.; Basu, A. STING Mediates Neuronal Innate  
713 Immune Response Following Japanese Encephalitis Virus Infection. *Sci. Rep.* **2012**,  
714 2, 347, doi:10.1038/srep00347.
- 715 46. Yu, P.; Miao, Z.; Li, Y.; Bansal, R.; Peppelenbosch, M.P.; Pan, Q. cGAS-STING  
716 effectively restricts murine norovirus infection but antagonizes the antiviral action of N-  
717 terminus of RIG-I in mouse macrophages.

- 718 <https://doi.org/10.1080/19490976.2021.1959839> **2021**, *13*, 1959839,  
719 doi:10.1080/19490976.2021.1959839.
- 720 47. Ma, F.; Li, B.; Yu, Y.; Iyer, S.S.; Sun, M.; Cheng, G. Positive feedback regulation of  
721 type I interferon by the interferon-stimulated gene STING. *EMBO Rep.* **2015**, *16*, 202–  
722 212, doi:10.15252/embr.201439366.
- 723 48. Changotra, H.; Jia, Y.; Moore, T.N.; Liu, G.; Kahan, S.M.; Sosnovtsev, S. V; Karst,  
724 S.M. Type I and type II interferons inhibit the translation of murine norovirus proteins.  
725 *J. Virol.* **2009**, *83*, 5683–92, doi:10.1128/JVI.00231-09.
- 726 49. Gaidt, M.M.; Ebert, T.S.; Chauhan, D.; Ramshorn, K.; Pinci, F.; Zuber, S.; O’Duill, F.;  
727 Schmid-Burgk, J.L.; Hoss, F.; Buhmann, R.; et al. The DNA Inflammasome in Human  
728 Myeloid Cells Is Initiated by a STING-Cell Death Program Upstream of NLRP3. *Cell*  
729 **2017**, *171*, 1110-1124.e18, doi:10.1016/j.cell.2017.09.039.
- 730 50. Sullender, M.E.; Baldrige, M.T. Norovirus interactions with the commensal  
731 microbiota. *PLOS Pathog.* **2018**, *14*, e1007183, doi:10.1371/journal.ppat.1007183.
- 732 51. Susanna, G.; Estes, M.K. Caliciviridae and Astroviridae. In *Cellular Signaling and*  
733 *Innate Immune Responses to RNA Virus Infections*; Brasier, A.R., García-Sastre, A.,  
734 Lemon, S.M., Eds.; ASM Press: Washington D.C., 2009; pp. 389–402 ISBN 978-1-  
735 55581-436-6.
- 736 52. Qu, L.; Murakami, K.; Broughman, J.R.; Lay, M.K.; Guix, S.; Tenge, V.R.; Atmar, R.L.;  
737 Estes, M.K. Replication of Human Norovirus RNA in Mammalian Cells Reveals Lack  
738 of Interferon Response. *J. Virol.* **2016**, *90*, 8906–23, doi:10.1128/JVI.01425-16.
- 739 53. Newman, K.L.; Moe, C.L.; Kirby, A.E.; Flanders, W.D.; Parkos, C.A.; Leon, J.S.  
740 Human norovirus infection and the acute serum cytokine response. *Clin. Exp.*  
741 *Immunol.* **2015**, *182*, 195–203, doi:10.1111/cei.12681.
- 742 54. Souza, M.; Cheetham, S.M.; Azevedo, M.S.P.; Costantini, V.; Saif, L.J. Cytokine and  
743 Antibody Responses in Gnotobiotic Pigs after Infection with Human Norovirus  
744 Genogroup II.4 (HS66 Strain). *J. Virol.* **2007**, *81*, 9183–9192, doi:10.1128/JVI.00558-  
745 07.
- 746 55. Souza, M.; Azevedo, M.S.P.; Jung, K.; Cheetham, S.; Saif, L.J. Pathogenesis and  
747 Immune Responses in Gnotobiotic Calves after Infection with the Genogroup II.4-  
748 HS66 Strain of Human Norovirus. *J. Virol.* **2008**, *82*, 1777–1786,  
749 doi:10.1128/jvi.01347-07.



- 750 56. Hosmillo, M.; Chaudhry, Y.; Nayak, K.; Sorgeloos, F.; Koo, B.K.; Merenda, A.;  
751 Lillestol, R.; Drumright, L.; Zilbauer, M.; Goodfellow, I. Norovirus replication in human  
752 intestinal epithelial cells is restricted by the interferon-induced JAK/STAT signaling  
753 pathway and rna polymerase ii-mediated transcriptional responses. *MBio* **2020**, *11*,  
754 doi:10.1128/mBio.00215-20.
- 755 57. Lin, S.C.; Qu, L.; Ettayebi, K.; Crawford, S.E.; Blutt, S.E.; Robertson, M.J.; Zeng, X.L.;  
756 Tenge, V.R.; Ayyar, B.V.; Karandikar, U.C.; et al. Human norovirus exhibits strain-  
757 specific sensitivity to host interferon pathways in human intestinal enteroids. *Proc.*  
758 *Natl. Acad. Sci. U. S. A.* **2020**, *117*, 23782–23793, doi:10.1073/pnas.2010834117.
- 759 58. Lin, L.; Han, J.; Yan, T.; Li, L.; Li, J.; Ao, Y.; Duan, Z.J.; Hou, Y. De Replication and  
760 transcriptionomic analysis of human noroviruses in human intestinal enteroids. *Am. J.*  
761 *Transl. Res.* **2019**, *11*, 3365–3374.
- 762 59. Ding, Q.; Cao, X.; Lu, J.; Huang, B.; Liu, Y.-J.; Kato, N.; Shu, H.-B.; Zhong, J.  
763 Hepatitis C virus NS4B blocks the interaction of STING and TBK1 to evade host  
764 innate immunity. *J. Hepatol.* **2013**, *59*, 52–8, doi:10.1016/j.jhep.2013.03.019.
- 765 60. Thomsen, M.K.; Nandakumar, R.; Stadler, D.; Malo, A.; Valls, R.M.; Wang, F.;  
766 Reinert, L.S.; Dagnaes-Hansen, F.; Hollensen, A.K.; Mikkelsen, J.G.; et al. Lack of  
767 immunological DNA sensing in hepatocytes facilitates hepatitis B virus infection.  
768 *Hepatology* **2016**, *64*, 746–59, doi:10.1002/hep.28685.
- 769 61. Davies, C.; Brown, C.M.; Westphal, D.; Ward, J.M.; Ward, V.K. Murine Norovirus  
770 Replication Induces G 0 /G 1 Cell Cycle Arrest in Asynchronously Growing Cells . *J.*  
771 *Virol.* **2015**, *89*, 6057–6066, doi:10.1128/JVI.03673-14.
- 772 62. Aarreberg, L.D.; Wilkins, C.; Ramos, H.J.; Green, R.; Davis, M.A.; Chow, K.; Gale, M.  
773 Interleukin-1 $\beta$  signaling in dendritic cells induces antiviral interferon responses. *MBio*  
774 **2018**, *9*, doi:10.1128/MBIO.00342-18.
- 775 63. Hyde, J.L.; Sosnovtsev, S. V.; Green, K.Y.; Wobus, C.; Virgin, H.W.; Mackenzie, J.M.  
776 Mouse Norovirus Replication Is Associated with Virus-Induced Vesicle Clusters  
777 Originating from Membranes Derived from the Secretory Pathway. *J. Virol.* **2009**, *83*,  
778 9709–9719, doi:10.1128/JVI.00600-09.
- 779 64. Doerflinger, S.Y.; Cortese, M.; Romero-Brey, I.; Menne, Z.; Tubiana, T.; Schenk, C.;  
780 White, P.A.; Bartenschlager, R.; Bressanelli, S.; Hansman, G.S.; et al. Membrane  
781 alterations induced by nonstructural proteins of human norovirus. *PLOS Pathog.*  
782 **2017**, *13*, e1006705, doi:10.1371/JOURNAL.PPAT.1006705.

- 783 65. Hu, M.; Zhou, M.; Bao, X.; Pan, D.; Jiao, M.; Liu, X.; Li, F.; Li, C.-Y. ATM inhibition  
784 enhances cancer immunotherapy by promoting mtDNA leakage and cGAS/STING  
785 activation. *J. Clin. Invest.* **2021**, *131*, doi:10.1172/JCI139333.
- 786 66. Fritzljar, S.; Aktepe, T.E.; Chao, Y.W.; Kenney, N.D.; McAllaster, M.R.; Wilen, C.B.;  
787 White, P.A.; Mackenzie, J.M. Mouse norovirus infection arrests host cell translation  
788 uncoupled from the stress granule-PKR-eIF2 $\alpha$  Axis. *MBio* **2019**, *10*,  
789 doi:10.1128/mBio.00960-19.
- 790 67. Brocard, M.; Iadevaia, V.; Klein, P.; Hall, B.; Lewis, G.; Lu, J.; Burke, J.; Willcocks,  
791 M.M.; Parker, R.; Goodfellow, I.G.; et al. Norovirus infection results in eIF2 $\alpha$   
792 independent host translation shut-off and remodels the G3BP1 interactome evading  
793 stress granule formation. *PLoS Pathog.* **2020**, *16*, doi:10.1371/journal.ppat.1008250.
- 794 68. Liu, Z.-S.; Cai, H.; Xue, W.; Wang, M.; Xia, T.; Li, W.-J.; Xing, J.-Q.; Zhao, M.; Huang,  
795 Y.-J.; Chen, S.; et al. G3BP1 promotes DNA binding and activation of cGAS. *Nat.*  
796 *Immunol.* **2018**, *20*, 18–28, doi:10.1038/s41590-018-0262-4.
- 797 69. Hu, S.; Sun, H.; Yin, L.; Li, J.; Mei, S.; Xu, F.; Wu, C.; Liu, X.; Zhao, F.; Zhang, D.; et  
798 al. PKR-dependent cytosolic cGAS foci are necessary for intracellular DNA sensing.  
799 *Sci. Signal.* **2019**, *12*, doi:10.1126/SCISIGNAL.AAV7934.
- 800 70. Cai, H.; Liu, X.; Zhang, F.; Han, Q.-Y.; Liu, Z.-S.; Xue, W.; Guo, Z.-L.; Zhao, J.-M.;  
801 Sun, L.-M.; Wang, N.; et al. G3BP1 Inhibition Alleviates Intracellular Nucleic Acid-  
802 Induced Autoimmune Responses. *J. Immunol.* **2021**, *206*, 2453–2467,  
803 doi:10.4049/JIMMUNOL.2001111.
- 804 71. Thorne, L.; Lu, J.; Chaudhry, Y.; Goodfellow, I. miR-155 induction is a marker of  
805 murine norovirus infection but does not contribute to control of replication in vivo.  
806 *Wellcome open Res.* **2018**, *3*, 42, doi:10.12688/wellcomeopenres.14188.1.
- 807 72. *Animals (Scientific Procedures) Act 1986*; Statute Law Database;
- 808 73. Kilkeny, C.; Browne, W.J.; Cuthill, I.C.; Emerson, M.; Altman, D.G. Improving  
809 Bioscience Research Reporting: The ARRIVE Guidelines for Reporting Animal  
810 Research. *PLoS Biol.* **2010**, *8*, e1000412, doi:10.1371/journal.pbio.1000412.
- 811 74. Storek, K.M.; Gertszov, N.A.; Ohlson, M.B.; Monack, D.M. cGAS and Irf1  
812 Cooperate To Produce Type I IFNs in Response to Francisella Infection. *J. Immunol.*  
813 **2015**, *194*, 3236–3245, doi:10.4049/JIMMUNOL.1402764.
- 814 75. Hwang, S.; Alhatlani, B.; Arias, A.; Caddy, S.L.; Christodoulou, C.; Cunha, J.B.;

- 815 Emmott, E.; Gonzalez-Hernandez, M.; Kolawole, A.; Lu, J.; et al. Murine norovirus:  
816 propagation, quantification, and genetic manipulation. *Curr. Protoc. Microbiol.* **2014**,  
817 **33**, 15K.2.1-61, doi:10.1002/9780471729259.mc15k02s33.
- 818 76. Chaudhry, Y.; Skinner, M.A.; Goodfellow, I.G. Recovery of genetically defined murine  
819 norovirus in tissue culture by using a fowlpox virus expressing T7 RNA polymerase. *J.*  
820 *Gen. Virol.* **2007**, **88**, 2091–2100, doi:10.1099/vir.0.82940-0.
- 821 77. Hierholzer, J.; Killington, R.A. Virus isolation and quantitation. In *Virology methods*  
822 *manual*; Mahy, B.W., Kangro, H.O., Eds.; Academic Press: San Diego, Calif., 1996; p.  
823 374 ISBN 9780080543581.
- 824 78. Livak, K.J.; Schmittgen, T.D. Analysis of relative gene expression data using real-time  
825 quantitative PCR and the 2(-Delta Delta C(T)) Method. *Methods* **2001**, **25**, 402–8,  
826 doi:10.1006/meth.2001.1262.
- 827 79. Dull, T.; Zufferey, R.; Kelly, M.; Mandel, R.J.; Nguyen, M.; Trono, D.; Naldini, L. A  
828 Third-Generation Lentivirus Vector with a Conditional Packaging System. *J. Virol.*  
829 **1998**, **72**, 8463–8471, doi:10.1128/JVI.72.11.8463-8471.1998.
- 830 80. Sanjana, N.E.; Shalem, O.; Zhang, F. Improved vectors and genome-wide libraries for  
831 CRISPR screening. *Nat. Methods* **2014**, **11**, 783–784,  
832 doi:10.1038/nmeth.3047.
- 833 81. Petro, T.M. ERK-MAP-kinases differentially regulate expression of IL-23 p19  
834 compared with p40 and IFN- $\beta$  in Theiler's virus-infected RAW264.7 cells. *Immunol.*  
835 *Lett.* **2005**, **97**, 47–53, doi:10.1016/j.imlet.2004.09.013.
- 836 82. Ma, H.; Qian, W.; Bambouskova, M.; Collins, P.L.; Porter, S.I.; Byrum, A.K.; Zhang,  
837 R.; Artyomov, M.; Oltz, E.M.; Mosammamarast, N.; et al. Barrier-to-autointegration  
838 factor 1 protects against a basal cGAS-STING response. *MBio* **2020**, **11**,  
839 doi:10.1128/MBIO.00136-20.

840

841

842

843

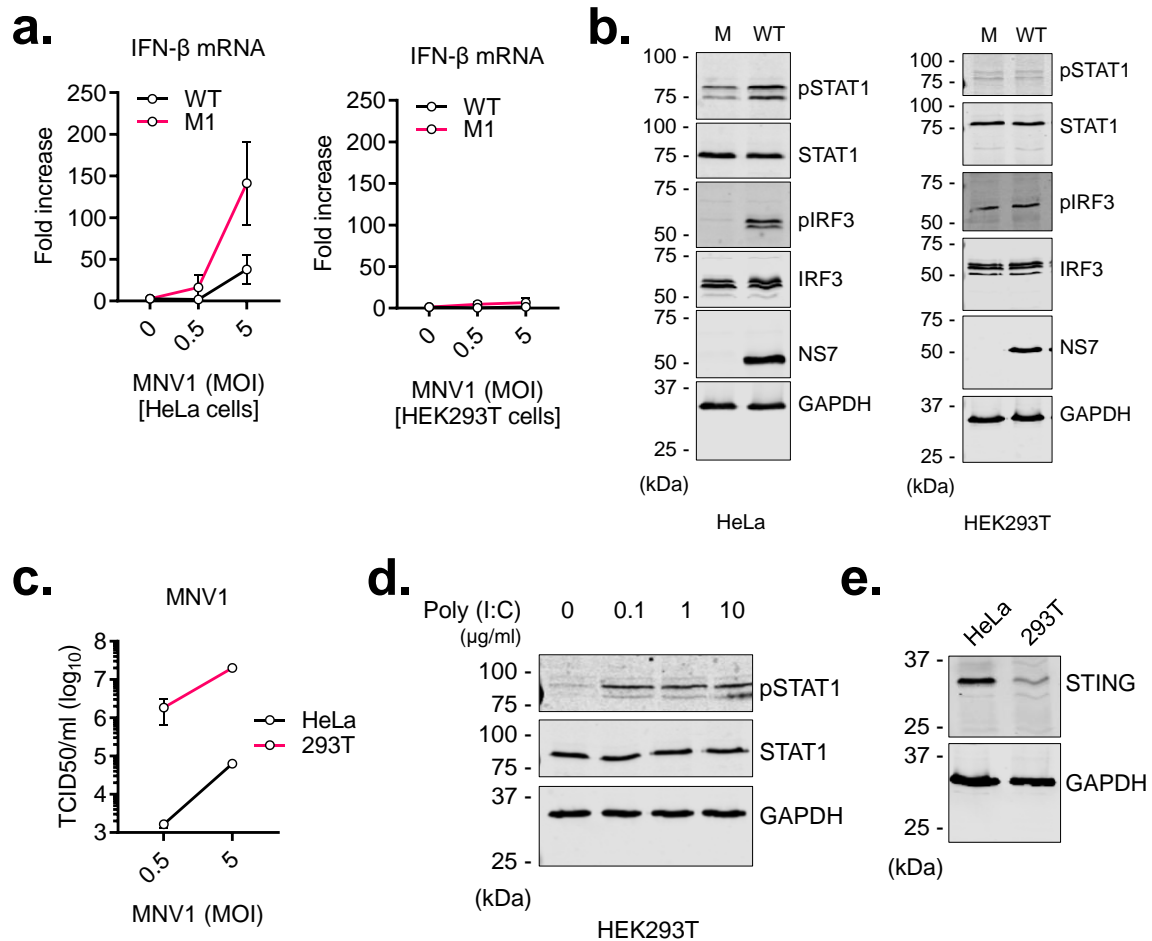

844

845 **Figure 1.** MNV induces IFNs only in STING-competent cells

846 (a) HeLa-CD300lf and HEK293T-CD300lf cells were infected at the indicated MOIs with either wild-type  
 847 MNV1 or the VF1-deleted M1 mutant. The cells were harvested 10h after infection and subjected to RT-  
 848 qPCR. Data represent two independent experiments done in triplicates, and is shown relative to mock-  
 849 infected cells, and normalised to human  $\beta$ -actin.

850 (b) HeLa-CD300lf and HEK293T-CD300lf cells were either mock-infected, or infected at an MOI of 10  
 851 with either wild-type MNV1 or the VF1-deleted M1 mutant. The cells were harvested 10h after infection  
 852 and assessed by western blotting for the indicated proteins.

853 (c) HeLa-CD300lf and HEK293T-CD300lf cells were infected at the indicated MOIs with wild-type  
 854 MNV1. The cells were harvested 10h after infection and infectious viral titres were determined using  
 855 TCID<sub>50</sub>. Data represent two independent experiments, each done in triplicates.

856 (d) HEK293T-CD300lf cells were transfected with indicated amounts of poly (I:C). The cells were  
 857 harvested 6h after transfection and assessed by western blotting for the indicated proteins.

858 (e) Lysates from HeLa-CD300lf and HEK293T-CD300lf cells were assessed by western blotting for  
 859 STING and GAPDH.

860

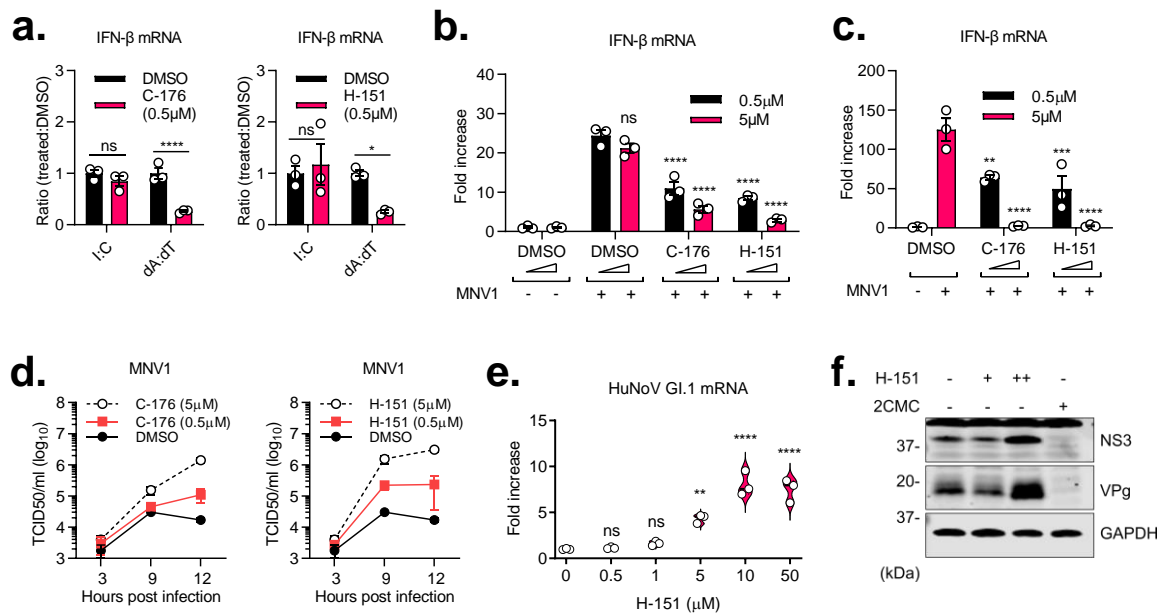

861

862 **Figure 2.** Small-molecule inhibition of STING activation enhances replication of noroviruses in cell lines  
863 and primary cells

864 (a) RAW267.4 cells pre-treated with DMSO, 0.5  $\mu$ M C-176 or 0.5  $\mu$ M H-151 for 2h, were either mock-  
865 transfected, or transfected with 1  $\mu$ g poly (I:C) or poly (dA:dT). The cells were harvested after 2h and  
866 subjected to RT-qPCR. Data represent experiments done in triplicates, and is shown relative to mock-  
867 transfected cells, and normalised to mouse Gapdh

868 (b) RAW267.4 cells pre-treated with DMSO, or indicated amounts of C-176 or H-151 for 2h, were either  
869 mock-infected or infected with wild-type MNV1 at an MOI of 10. The cells were harvested 9h post-  
870 infection and subjected to RT-qPCR. Data represent two independent experiments done in triplicates,  
871 and is shown relative to mock-infected cells, and normalised to mouse Gapdh

872 (c) BMDM cells pre-treated with DMSO, or indicated amounts of C-176 or H-151 for 2h, were either  
873 mock-infected or infected with wild-type MNV1 at an MOI of 10. The cells were harvested 12h post-  
874 infection and subjected to RT-qPCR. Data represent two independent experiments done in triplicates,  
875 and is shown relative to mock-transfected cells, and normalised to mouse Gapdh

876 (d) BMDM cells pre-treated with DMSO, or indicated amounts of C-176 (left panel) or H-151 (right panel)  
877 for 2h, were either mock-infected or infected with wild-type MNV1 at an MOI of 10. The samples were  
878 harvested at different time points post infection and infectious viral titres were determined using TCID50.  
879 Data represent two independent experiments, each done in triplicates.

880 (e) Pre-seeded HGT-NV cells were treated with DMSO or indicated doses of H-151. The cells were  
881 harvested 24h post treatment and subjected to RT-qPCR. Data represent two independent experiments  
882 done in triplicates, and is shown relative to DMSO-treated cells, and normalised to human  $\beta$ -actin.

883 (f) Pre-seeded HGT-NV cells were treated with DMSO, H-151 (+ = 0.5  $\mu$ M, ++ = 5  $\mu$ M), or 2CMC (200  $\mu$ M).  
884 The cells were harvested 72h post treatment and assessed by western blotting for the indicated  
885 proteins.

886

887

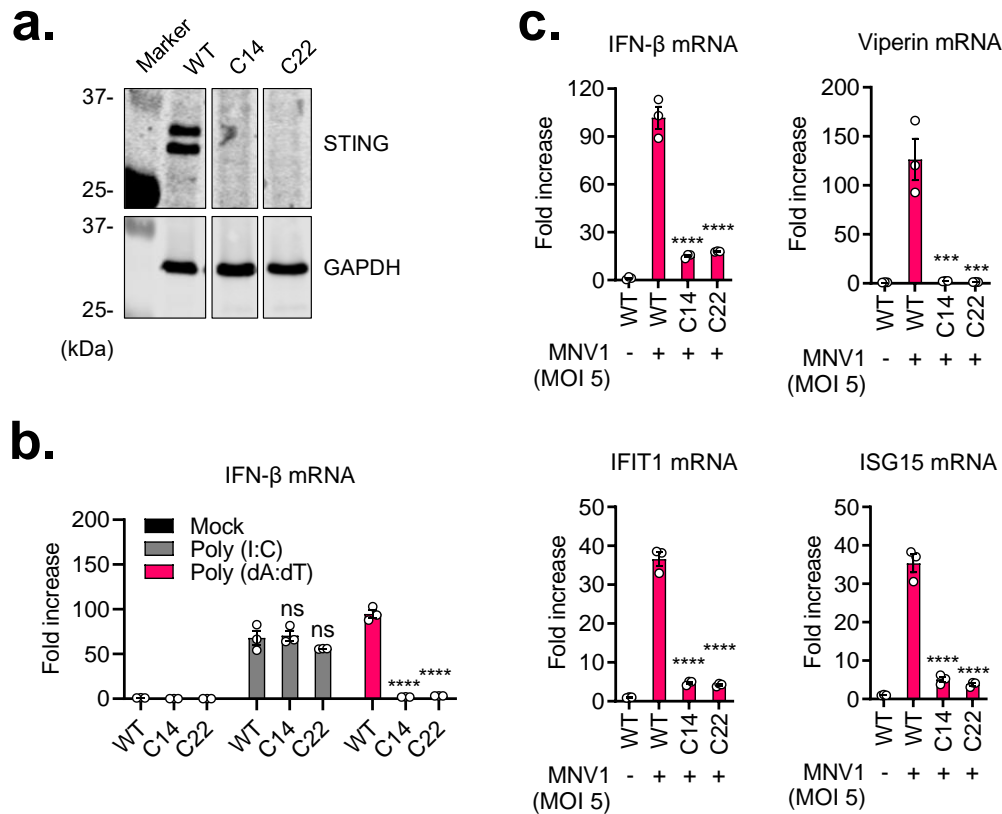

888

889 **Figure 3.** STING<sup>-/-</sup> cells induce an attenuated antiviral response against noroviruses

890 (a) STING<sup>+/+</sup> (WT) and clones 14 and 22 STING<sup>-/-</sup> (C14 and C22, respectively) RAW264.7 cells were  
891 assessed by western blotting for the indicated proteins.

892 (b) STING<sup>+/+</sup> (WT) and clones 14 and 22 STING<sup>-/-</sup> (C14 and C22, respectively) RAW264.7 cells, were  
893 mock transfected, transfected with 1 μg/ml of Poly (I:C), or with 1 μg/ml of Poly (dA:dT) for 6h, and were  
894 subsequently harvested and assessed for IFN-β mRNA using RT-qPCR. Data is expressed relative to control and  
895 normalised to Gapdh.

896 (c) STING<sup>+/+</sup> (WT) and clones 14 and 22 STING<sup>-/-</sup> (C14 and C22, respectively) RAW264.7 cells, were  
897 mock infected or infected with wild-type MNV1 at an MOI of 5 and harvested at 9h post infection.  
898 Samples were assessed for IFN-β mRNA via RT-qPCR. Data is presented relative to control and  
899 normalised to Gapdh.

900

901

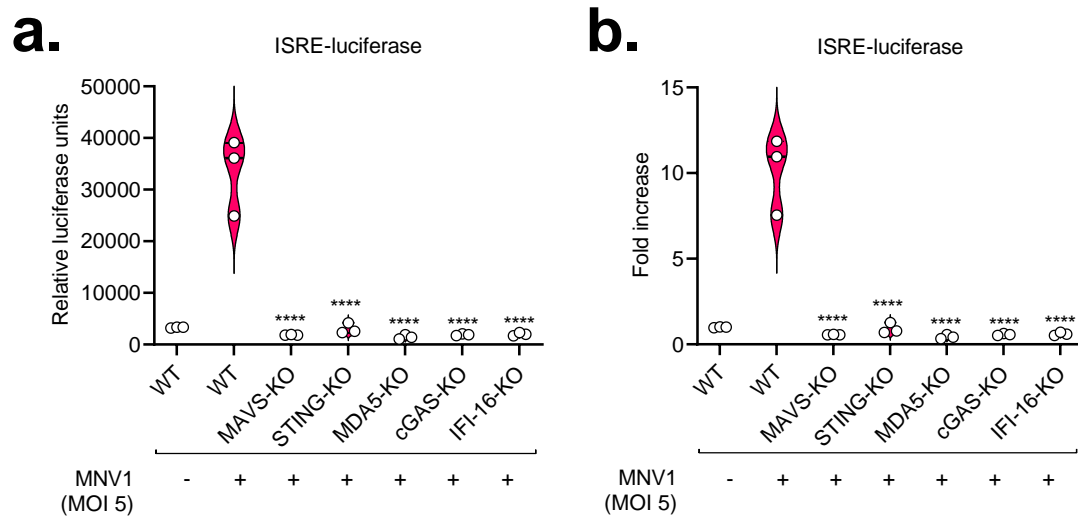

902

903 **Figure 4.** Both cGAS and IFI-16 contribute to IFN responses in norovirus-infected cells

904 (a) and (b) Wild-type RAW-Lucia ISG cells or those with the indicated knockouts were either mock-  
905 infected or infected with wild-type MNV1 at an MOI of 5. The supernatants were harvested 18h post  
906 infection and analysed for Lucia luciferase levels on a luminometer. Data is presented as raw RLU (a)  
907 or fold increase relative to the mock-infected (b).

908

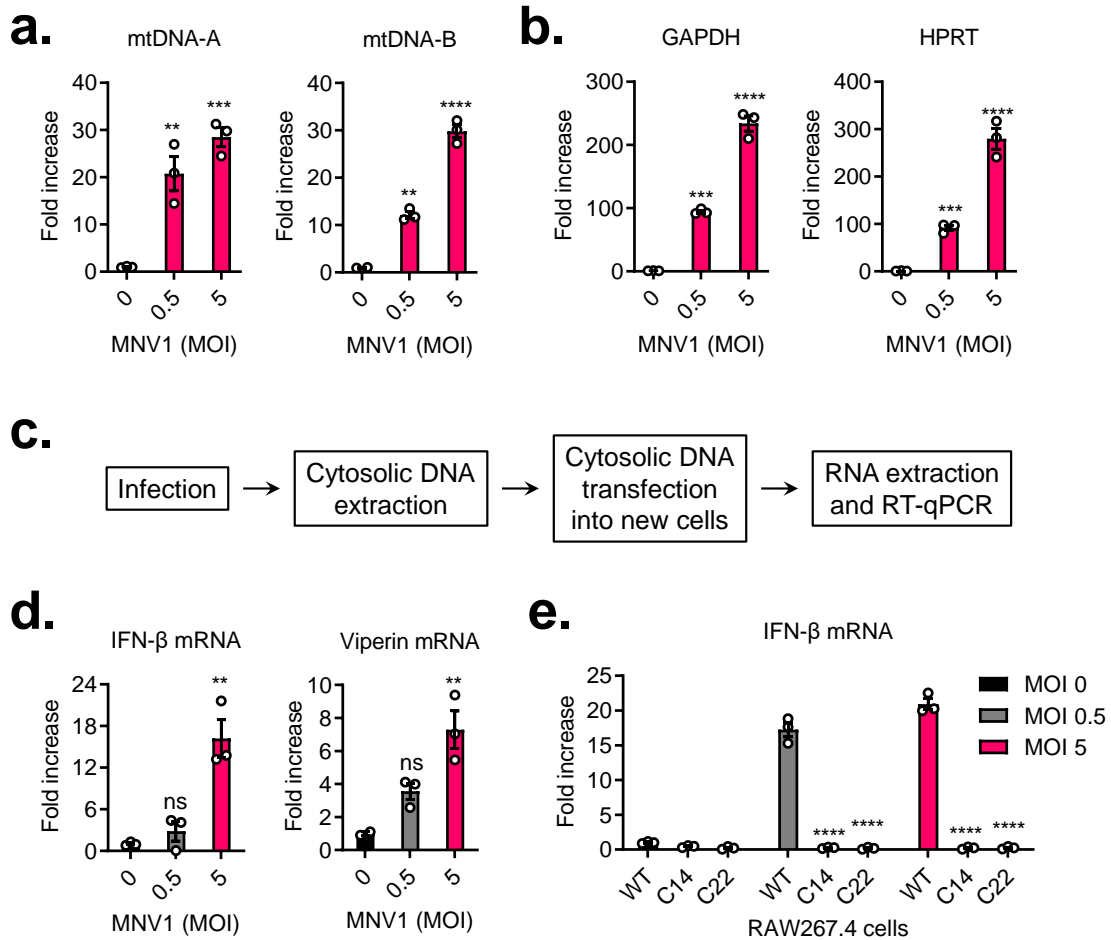

909

910 **Figure 5.** Aberrant cytosolic DNA from norovirus-infected cells induces an IFN response, in a STING-  
911 dependent manner

912 (a) and (b) RAW264.7 cells were either mock-infected or infected with MNV1 at the indicated  
913 MOI. The cells were harvested 10h post infection and assessed for cytosolic DNA by qPCR. Data is  
914 presented relative to GFP and normalised to their corresponding whole cell fractions.

915 (c) Schematic representation of the experiments carried out in (d) and (e)

916 (d) and (e) RAW264.7 cells were infected with MNV1 at the indicated MOIs. The cells were harvested  
917 and fractionated 10h post infection, and DNA was extracted from the cytosolic and whole cell fractions.  
918 Pre-seeded cells were transfected with normalised amounts of the cytosolic DNA, harvested 9h post  
919 transfection, and analysed by qPCR. Data is presented relative to control and normalised to Gapdh.

920



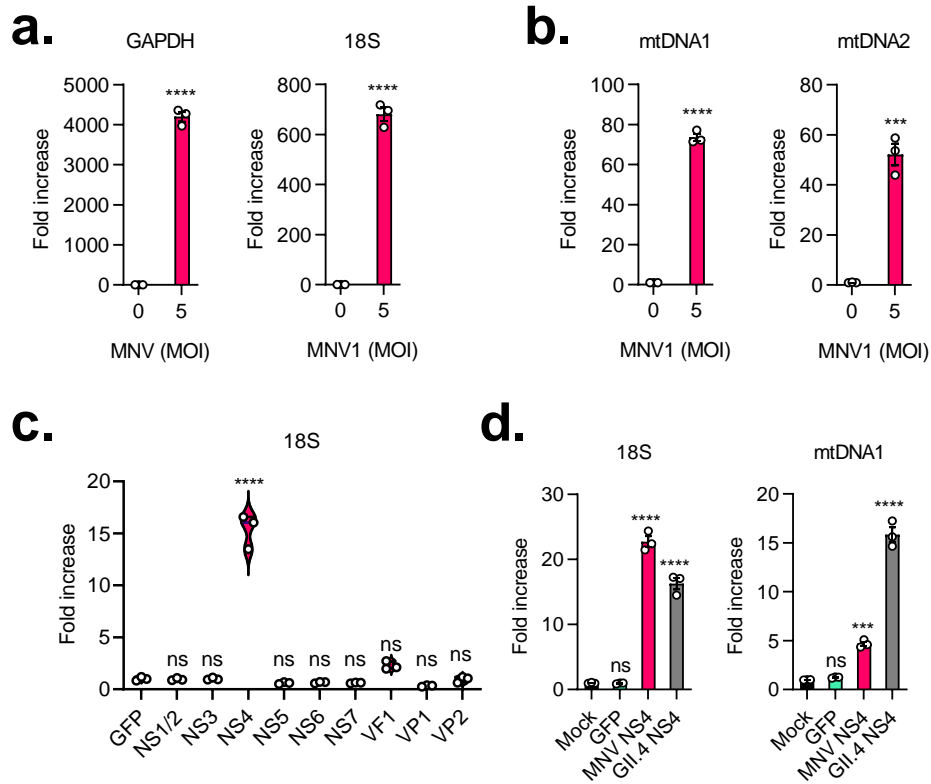

921

922 **Figure 6.** NS4 proteins of noroviruses promote accumulation of cytosolic DNA

923 (a) and (b) HEK293T-CD300lf cells were either mock-infected or infected with MNV1 at an MOI of 5.  
924 The cells were harvested 10h post infection and assessed for cytosolic DNA by qPCR. Data is  
925 presented relative to GFP and normalised to their corresponding whole cell fractions.

926 (d) and (d) HEK293T-CD300lf cells were transfected with Flag-tagged construct plasmids of the  
927 indicated proteins. The cells were harvested 24h post transfection and assessed for cytosolic DNA by  
928 qPCR. Data is presented relative to GFP and normalised to their corresponding whole cell fractions.

929

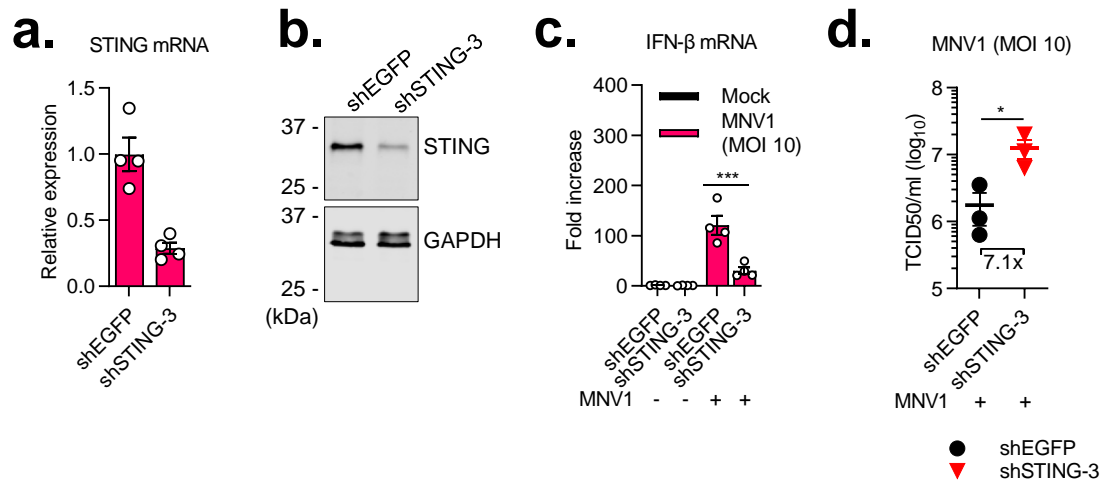

930

931 **Figure S1.** STING knockdown impairs IFN induction and increases virus replication in MNV-infected  
932 cells

933 (a) and (b) RAW264.7 cells stably transduced with control shRNA (shEGFP) or shRNA targeting mouse  
934 STING (shSTING-3) were lysed and assessed for STING mRNA via RT-qPCR (a) or analysed via  
935 western blotting (b). Data in the left panel is presented relative to control and normalised to Gapdh.

936 (c) and (d) RAW264.7 cells stably transduced with control shRNA (shEGFP) or shRNA targeting mouse  
937 STING (shSTING-3), were mock infected or infected with wild-type MNV1 at an MOI of 10 and harvested  
938 at 9h post infection. Samples were assessed for IFN- $\beta$  mRNA via RT-qPCR (c), or infectious viral titres  
939 were determined using TCID<sub>50</sub> (d). Data in (c) is presented relative to control and normalised to Gapdh.

940

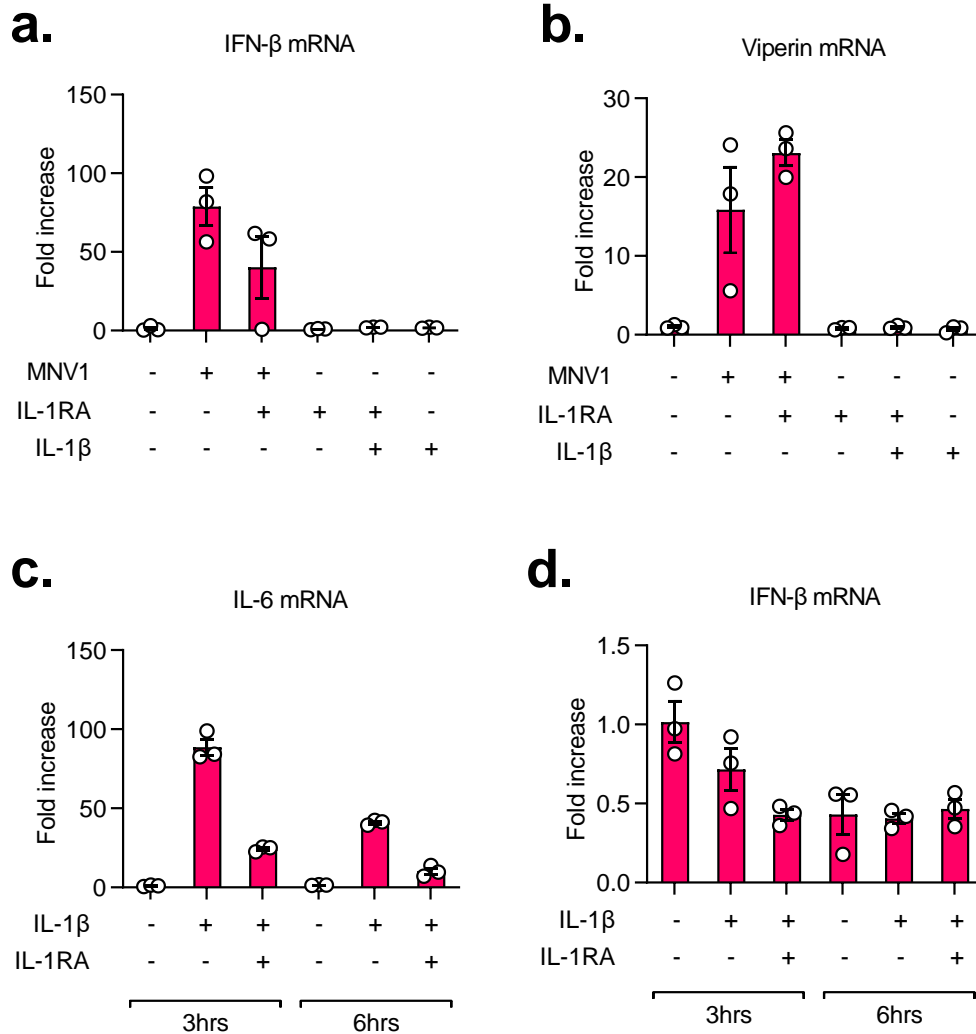

941

942 **Figure S2.** Inhibition of IL-1β signalling did not inhibit IFN responses in MNV-1 infected RAW264.7 cells,  
 943 and IL-1β treatment failed to induce IFN-β in A549 cells.

944 (a) and (b) RAW264.7 cells were either mock-treated or treated with 100ng/ml of recombinant IL-1RA  
 945 for 30 minutes before infection with MNV1 at an MOI of 5, or treatment with 10ng of recombinant mouse  
 946 IL-1β. The cells were harvested at 12h post infected and analysed by RT-qPCR. Data is presented  
 947 relative to control and normalised to Gapdh

948 (c) and (d) A549 cells were either mock-treated or treated with 100ng/ml of recombinant IL-1RA for 30  
 949 minutes before treatment with 10ng of recombinant human IL-1β. The cells were harvested at the  
 950 indicated timepoints and analysed by RT-qPCR. Data is presented relative to control and normalised  
 951 to β-actin.

952

953

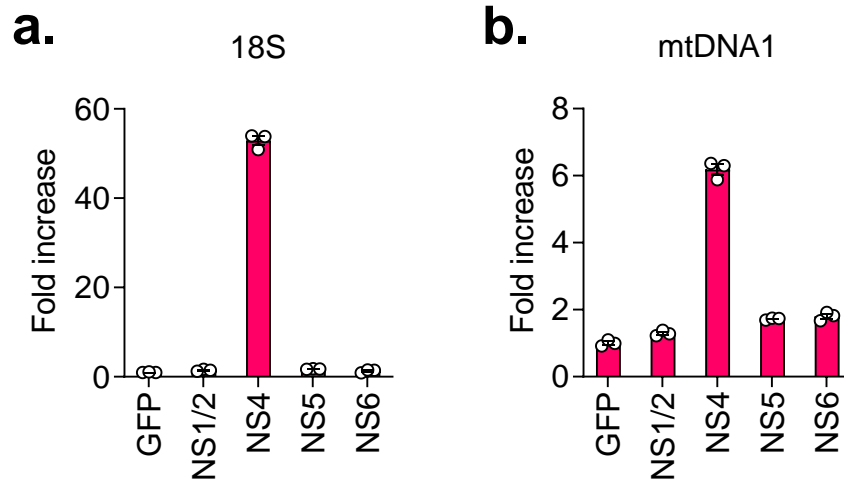

954

955

956 **Figure S3.** NS4, but not NS1-2 or NS6 (VPg), is sufficient for leakage of genomic and mitochondrial  
957 DNA in cell lines.

958 (a) and (b) HEK293T-CD300lf cells were transfected with Flag-tagged construct plasmids of the  
959 indicated proteins. The cells were harvested 24h post transfection and assessed for cytosolic DNA by  
960 qPCR. Data is presented relative to GFP and normalised to their corresponding whole cell fractions.

961

962

963

964

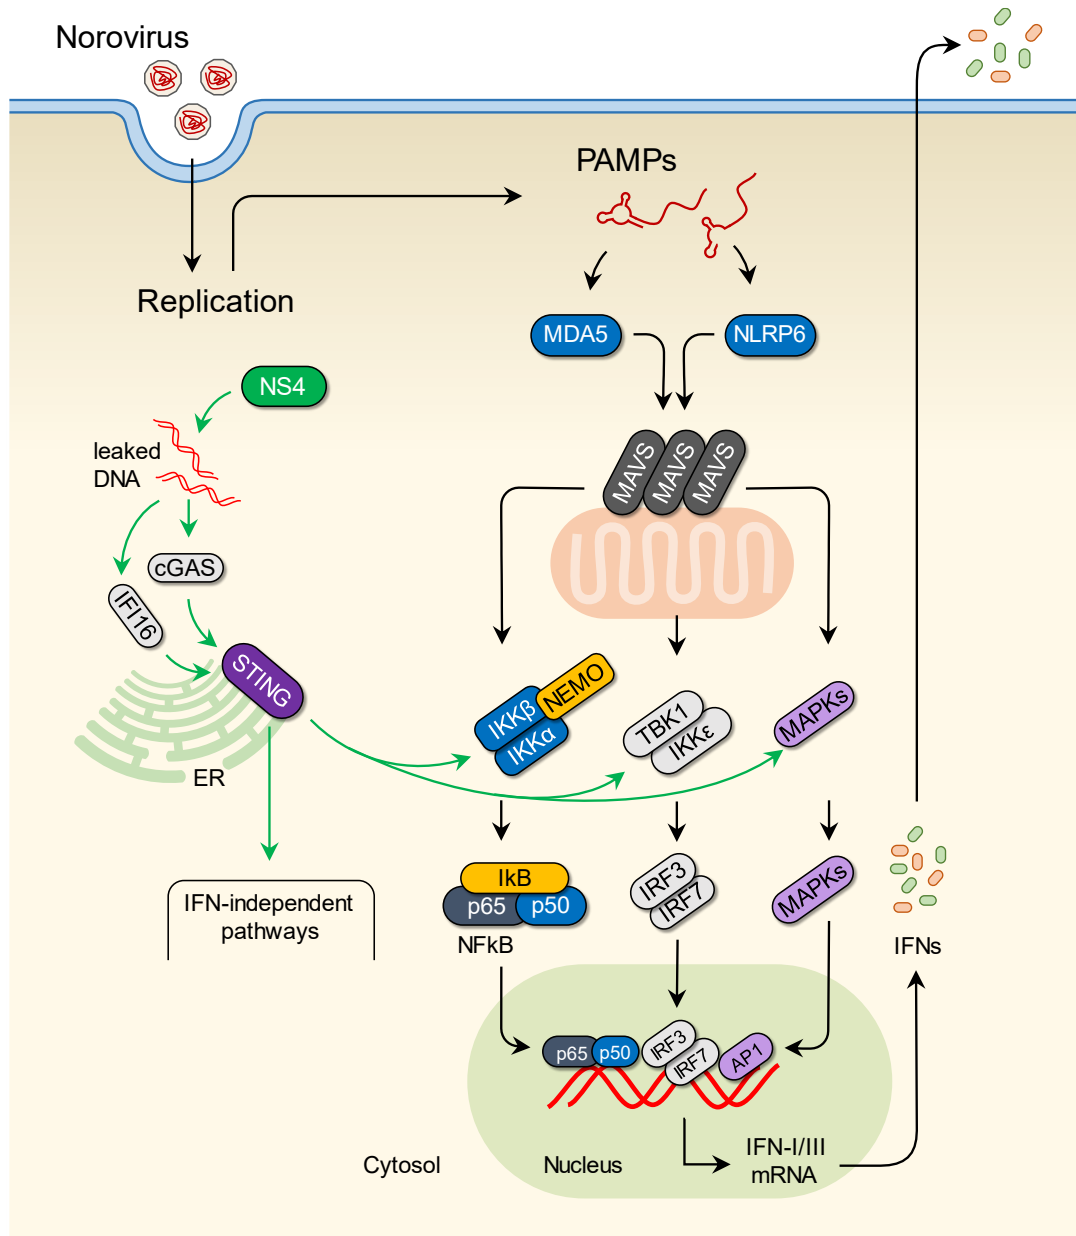

965

966 **Figure 7.** Contribution of leaked genomic and mitochondrial DNA to the host response to noroviruses  
967 in a STING-dependent manner. The MDA5/NLRP6/MAVS pathway is thought to play a central role in  
968 the detection of PAMPs in norovirus-infected cells, initiating a signalling cascade that leads to induction  
969 of type I and type III IFNs. Our data show that accumulation of genomic and mitochondrial DNA in the  
970 cytosol, driven by the viral NS4, likely activates the cGAS/IFI16/STING pathway. The combined  
971 activation of the two pathways is required for a robust IFN response and restriction of norovirus  
972 replication.

973

974

975

**Table 1: List of plasmids used**

| <b>sn</b> | <b>Name</b>       | <b>Insert/description</b>                              | <b>Source</b>             | <b>Comments</b>                                                                                                                                                  |
|-----------|-------------------|--------------------------------------------------------|---------------------------|------------------------------------------------------------------------------------------------------------------------------------------------------------------|
| 1.        | pT7:MNV-1_3'Rz    | MNV1 WT cDNA clone                                     | Chaudhry et al. 2007 [76] | For generating wild type MNV1                                                                                                                                    |
| 2.        | pT7:MNV-1_3'Rz_M1 | MNV1 M1 cDNA clone                                     | McFadden et al. 2011 [23] | Similar to pT7:MNV-1_3'Rz, but with a T5118A mutation that introduces a stop codon 17 amino acids downstream of the VF1 start codon and a silent mutation in VP1 |
| 3.        | pFS669IG          | Mouse CD300lf                                          | This work                 |                                                                                                                                                                  |
| 4.        | pMDLg/pRRE        | Encodes Gag and Pol; contains the rev response element | Dull et al. [79]          | 3rd generation lentiviral packaging plasmid, Addgene #12251                                                                                                      |
| 5.        | pRSV-Rev          | Encodes Rev                                            | Dull et al. [79]          | 3rd generation lentiviral packaging plasmid, Addgene #12253                                                                                                      |
| 6.        | pMD2G             | VSV-G envelop plasmid                                  | Dull et al. [79]          | 3rd generation lentiviral packaging plasmid, Addgene #12259                                                                                                      |
| 7.        | shEGFP            | shRNA sequence targeting EGFP                          | Sigma (SHC005)            | MISSION pLKO.1-puro Control Plasmid                                                                                                                              |
| 8.        | shSTING-3         | Mouse STING (TMEM173) shRNA                            | Sigma (SHCLNG-NM_028261)  | MISSION shRNA plasmid TRCN0000346266                                                                                                                             |
| 9.        | pAJ093IG          | FLAG-EGFP                                              | This work                 | Gateway cloning; N-terminal tag                                                                                                                                  |
| 10.       | pFS610IG          | FLAG-NS1-2                                             | This work                 | MNV1 protein, Gateway cloning, N-terminal tag                                                                                                                    |
| 11.       | pFS611IG          | FLAG-NS3                                               | This work                 | MNV1 protein, Gateway cloning, N-terminal tag                                                                                                                    |
| 12.       | pFS612IG          | FLAG-NS4                                               | This work                 | MNV1 protein, Gateway cloning, N-terminal tag                                                                                                                    |
| 13.       | pFS613IG          | FLAG-NS5                                               | This work                 | MNV1 protein, Gateway cloning, N-terminal tag                                                                                                                    |
| 14.       | pFS614IG          | FLAG-NS6                                               | This work                 | MNV1 protein, Gateway cloning, N-terminal tag                                                                                                                    |
| 15.       | pFS615IG          | FLAG-NS7                                               | This work                 | MNV1 protein, Gateway cloning, N-terminal tag                                                                                                                    |
| 16.       | pFS616IG          | FLAG-VF1                                               | This work                 | MNV1 protein, Gateway cloning, codon-optimised, N-terminal tag                                                                                                   |

|     |          |                   |           |                                                                                                                                       |
|-----|----------|-------------------|-----------|---------------------------------------------------------------------------------------------------------------------------------------|
| 17. | pFS621IG | FLAG-VP1          | This work | MNV1 protein, Gateway cloning, N-terminal tag                                                                                         |
| 18. | pFS617IG | FLAG-VP2          | This work | MNV1 protein, Gateway cloning, N-terminal tag                                                                                         |
| 19. | pAJ124IG | FLAG-GII.4-NS4    | This work | HuNoV protein, Gateway cloning, N-terminal tag                                                                                        |
| 20. | pAJ221IG | mouse STING sgRNA | This work | sgRNA sequence<br>AGCAAAACATCGACCGTGC<br>(previously reported by Storek et al. [74]), cloned into LentiCRISPRv2 (Addgene #52961 [80]) |

976

977

978

**Table 2: List of antibodies used for western blots**

| <b>sn</b> | <b>Target</b> | <b>Supplier</b> | <b>Catalogue Number</b> | <b>Dilution</b> |
|-----------|---------------|-----------------|-------------------------|-----------------|
| 1.        | Mouse GAPDH   | Ambion          | AM4300                  | 1:20000         |
| 2.        | Human GAPDH   | Protein Tech    | 10494-1-AP              | 1:20000         |
| 3.        | Human IRF3    | Abclonal        | A11373                  | 1:250           |
| 4.        | Human pIRF3   | Abcam           | ab138449                | 1:500           |
| 5.        | STAT1         | Abcam           | ab92506                 | 1:500           |
| 6.        | pSTAT1        | Cell signalling | 9167S                   | 1:500           |
| 7.        | STING (D2P2F) | Cell signalling | #13647                  | 1:500           |
| 8.        | NS3           | Non-commercial  | -                       | 1:500           |
| 9.        | VPg           | Non-commercial  | -                       | 1:500           |
| 10.       | NS7           | Non-commercial  | -                       | 1:500           |

979

980



**Table 3: List of RT-qPCR Primers used**

| <b>sn</b> | <b>Target</b>  | <b>Lab no.</b> | <b>Sequence (FWD, REV)</b>    | <b>Ref.</b>        |
|-----------|----------------|----------------|-------------------------------|--------------------|
| 1.        | Mouse          | IGUC0339       | ATGAACAACAGGTGGATCCTCC        | Petro<br>2005 [81] |
|           | <i>Ifnb1</i>   | IGUC0340       | AGGAGCTCCTGACATTTCCGAA        |                    |
| 2.        | Mouse          | IGUC1898       | GGTTCAAGGACTATGGGGAGTATTTGGAC | This work          |
|           | <i>Viperin</i> | IGUC1899       | GAAATCTTTCTGCTTCCCTCAGGGCATC  |                    |
| 3.        | Mouse          | IGUC1052       | CTGAGATGTCACTTCACATGGAA       | This work          |
|           | <i>IFIT1</i>   | IGUC1053       | GTGCATCCCCAATGGGTTCT          |                    |
| 4.        | Mouse          | IGUC1902       | GGTAACGATTTCTGGTGTCCG         | This work          |
|           | <i>Isg15</i>   | IGUC1903       | GCTCAGCCAGAACTGGTCTTCG        |                    |
| 5.        | Mouse          | IGUC0945       | CATGGCCTTCCGTGTTCCCTA         | -                  |
|           | <i>Gapdh</i>   | IGUC0946       | GCGGCACGTCAGATCCA             |                    |
| 6.        | Human          | IGUC0784       | TTCTACAATGAGCTGCGTGTG         | -                  |
|           | $\beta$ -actin | IGUC0785       | GGGGTGTGAAGGTCTCAAA           |                    |
| 7.        | Human          | IGUC0772       | CAGAAGGAGGACGCCGATTGAC        | -                  |
|           | <i>IFNB1</i>   | IGUC0773       | CCAGGCACAGTACTGTACTCC         |                    |

981

982

983

**Table 4: List of genomic and mitochondrial DNA Primers used**

| <i>sn</i> | Target            | Lab no.  | Sequence (FWD, REV)      | Ref.                 |
|-----------|-------------------|----------|--------------------------|----------------------|
| 1.        | Mouse             | IGUC4428 | CGTTGAATTTGCCGTGAGTG     | This work            |
|           | GAPDH             | IGUC4429 | CACTACAGACCCATGAGGAGT    |                      |
| 2.        | Mouse             | IGUC4432 | CCACTTGTGACGAAAGCACC     | This work            |
|           | HPRT              | IGUC4433 | GTTGTCTACGCTCTGGCAGT     |                      |
| 3.        | Mouse             | IGUC4405 | TCGGAGCCCCAGATATAGCATT   | Ma et al. [82]       |
|           | mtDNA-A<br>(COX1) | IGUC4406 | CTGCTCCTGCTTCTACTATTGATG |                      |
| 4.        | Mouse             | IGUC4219 | GCCCCAGATATAGCATTCCC     | Moriyama et al. [12] |
|           | mtDNA-B<br>(COX1) | IGUC4220 | GTTTCATCCTGTTCTGCTCC     |                      |
| 5.        | Human             | IGUC4440 | CTCTGCTCCTCCTGTTTCGAC    | Aguirre et al. [11]  |
|           | GAPDH             | IGUC4441 | AATCCGTTGACTCCGACCTT     |                      |
| 6.        | Human             | IGUC4442 | TAGAGGGACAAGTGGCGTTC     | Aguirre et al. [11]  |
|           | 18S               | IGUC4443 | CGCTGAGCCAGTCAGTGT       |                      |
| 7.        | Human             | IGUC4444 | CACCCAAGAACAGGGTTTGT     | Aguirre et al. [11]  |
|           | mtDNA1            | IGUC4445 | TGGCCATGGGTATGTTGTAA     |                      |
| 8.        | Human             | IGUC4446 | CTATCACCCCTATTAACCACTCA  | Aguirre et al. [11]  |
|           | mtDNA2            | IGUC4447 | TTCGCCTGTAATATTGAACGTA   |                      |

984

985

986
